# Supplementary material for: Differential cellular responses to FDA-approved nanomedicines: an exploration of albumin-based nanocarriers and liposomes in protein corona formation
Source: Royal Society of Chemistry journal article supplement (doi:10.1039/d3nr04862d), 2023-01-01
Supplement: d3nr04862d1.xlsx [file d3nr04862d1.xlsx]

## Sheet: Table S1_Albumin NPs-avg_15 (2)
Table S1: Identified proteins in albumin NPs in low serum (15% fetal bovine serum)
Normalized spectra count	Accession number	Protein name	PI	MW (Da)
0.0835499	P01966	HBA_BOVIN Hemoglobin subunit alpha OS=Bos taurus OX=9913 GN=HBA PE=1 SV=2	8.19	15053.2
0.0563946	Q95121	PEDF_BOVIN Pigment epithelium-derived factor OS=Bos taurus OX=9913 GN=SERPINF1 PE=1 SV=1	6.31	44056.3
0.0561297	P81644	APOA2_BOVIN Apolipoprotein A-II OS=Bos taurus OX=9913 GN=APOA2 PE=1 SV=2	5.34	8722.76
0.047797	P02081	HBBF_BOVIN Hemoglobin fetal subunit beta OS=Bos taurus OX=9913 PE=1 SV=1	6.51	15859.2
0.0463787	P02769	ALBU_BOVIN Albumin OS=Bos taurus OX=9913 GN=ALB PE=1 SV=4	5.6	66433
0.0301801	P19035	APOC3_BOVIN Apolipoprotein C-III OS=Bos taurus OX=9913 GN=APOC3 PE=1 SV=2	4.73	8217.01
0.0243106	P62803	H4_BOVIN Histone H4 OS=Bos taurus OX=9913 PE=1 SV=2	11.36	11236.1
0.0205226	P12763	FETUA_BOVIN Alpha-2-HS-glycoprotein OS=Bos taurus OX=9913 GN=AHSG PE=1 SV=2	5.1	36353.2
0.0199217	Q32KY0	APOD_BOVIN Apolipoprotein D OS=Bos taurus OX=9913 GN=APOD PE=2 SV=1	4.86	19467.2
0.0172658	Q03247	APOE_BOVIN Apolipoprotein E OS=Bos taurus OX=9913 GN=APOE PE=1 SV=1	5.44	34126.5
0.0170485	Q29443	TRFE_BOVIN Serotransferrin OS=Bos taurus OX=9913 GN=TF PE=2 SV=1	6.5	75829.7
0.016451	Q2UVX4	CO3_BOVIN Complement C3 OS=Bos taurus OX=9913 GN=C3 PE=1 SV=2	6.37	185047
0.0136175	P19034	APOC2_BOVIN Apolipoprotein C-II OS=Bos taurus OX=9913 GN=APOC2 PE=1 SV=2	5.13	7944.97
0.0128724	P15497	APOA1_BOVIN Apolipoprotein A-I OS=Bos taurus OX=9913 GN=APOA1 PE=1 SV=3	5.36	27549.1
0.0124247	P34955	A1AT_BOVIN Alpha-1-antiproteinase OS=Bos taurus OX=9913 GN=SERPINA1 PE=1 SV=1	5.98	43693.9
0.010817	Q5E9F8	H33_BOVIN Histone H3.3 OS=Bos taurus OX=9913 GN=H3-3A PE=1 SV=3	11.27	15196.7
0.00927822	Q7SIH1	A2MG_BOVIN Alpha-2-macroglobulin OS=Bos taurus OX=9913 GN=A2M PE=1 SV=2	5.68	165053
0.00904882	Q2KIS7	TETN_BOVIN Tetranectin OS=Bos taurus OX=9913 GN=CLEC3B PE=2 SV=1	5.69	19824.5
0.00893535	Q3SX14	GELS_BOVIN Gelsolin OS=Bos taurus OX=9913 GN=GSN PE=2 SV=1	5.54	80730.7
0.00864799	Q8SPJ1	PLAK_BOVIN Junction plakoglobin OS=Bos taurus OX=9913 GN=JUP PE=2 SV=1	5.75	81820.8
0.00779908	P81187	CFAB_BOVIN Complement factor B OS=Bos taurus OX=9913 GN=CFB PE=1 SV=2	7.68	82850.1
0.00676632	P02662	CASA1_BOVIN Alpha-S1-casein OS=Bos taurus OX=9913 GN=CSN1S1 PE=1 SV=2	4.91	22974.9
0.00669495	Q5E9E3	C1QA_BOVIN Complement C1q subcomponent subunit A OS=Bos taurus OX=9913 GN=C1QA PE=2 SV=1	9.12	23519.3
0.00664712	Q3SZR3	A1AG_BOVIN Alpha-1-acid glycoprotein OS=Bos taurus OX=9913 GN=ORM1 PE=2 SV=1	5.67	21253
0.00637054	P04272	ANXA2_BOVIN Annexin A2 OS=Bos taurus OX=9913 GN=ANXA2 PE=1 SV=2	6.9	38480.9
0.00634833	Q2KJF1	A1BG_BOVIN Alpha-1B-glycoprotein OS=Bos taurus OX=9913 GN=A1BG PE=1 SV=1	5.37	51284.8
0.00622301	Q3SYR5	APOC4_BOVIN Apolipoprotein C-IV OS=Bos taurus OX=9913 GN=APOC4 PE=2 SV=1	9.07	11653.2
0.00607696	P62992	RS27A_BOVIN Ubiquitin-40S ribosomal protein S27a OS=Bos taurus OX=9913 GN=RPS27A PE=1 SV=2	6.56	8564.84
0.00569183	Q3MHM7	RL35_BOVIN 60S ribosomal protein L35 OS=Bos taurus OX=9913 GN=RPL35 PE=2 SV=3	11.04	14565.5
0.00540846	P00432	CATA_BOVIN Catalase OS=Bos taurus OX=9913 GN=CAT PE=1 SV=3	6.82	59784.1
0.00482553	P06868	PLMN_BOVIN Plasminogen OS=Bos taurus OX=9913 GN=PLG PE=1 SV=2	7.39	88393.5
0.00457006	O46375	TTHY_BOVIN Transthyretin OS=Bos taurus OX=9913 GN=TTR PE=1 SV=1	5.91	13557.3
0.00454356	P62833	RAP1A_BOVIN Ras-related protein Rap-1A OS=Bos taurus OX=9913 GN=RAP1A PE=1 SV=1	6.39	20647.7
0.00436804	Q17QW1	BORG5_BOVIN Cdc42 effector protein 1 OS=Bos taurus OX=9913 GN=CDC42EP1 PE=2 SV=1	7.86	37333.6
0.00433412	P10096	G3P_BOVIN Glyceraldehyde-3-phosphate dehydrogenase OS=Bos taurus OX=9913 GN=GAPDH PE=1 SV=4	8.52	35736.9
0.00420261	P32007	ADT3_BOVIN ADP/ATP translocase 3 OS=Bos taurus OX=9913 GN=SLC25A6 PE=1 SV=3	9.82	32877.4
0.0041549	P81287	ANXA5_BOVIN Annexin A5 OS=Bos taurus OX=9913 GN=ANXA5 PE=1 SV=3	4.85	35957.7
0.00412247	P02465	CO1A2_BOVIN Collagen alpha-2(I) chain OS=Bos taurus OX=9913 GN=COL1A2 PE=1 SV=2	9.93	93415.3
0.0041083	Q08DP2	BORC5_BOVIN BLOC-1-related complex subunit 5 OS=Bos taurus OX=9913 GN=BORCS5 PE=2 SV=1	6	22069.1
0.00385794	P68103	EF1A1_BOVIN Elongation factor 1-alpha 1 OS=Bos taurus OX=9913 GN=EEF1A1 PE=1 SV=1	9.1	50009.7
0.00366031	P02453	CO1A1_BOVIN Collagen alpha-1(I) chain OS=Bos taurus OX=9913 GN=COL1A1 PE=1 SV=3	9.28	94673
0.00343866	Q28107	FA5_BOVIN Coagulation factor V OS=Bos taurus OX=9913 GN=F5 PE=1 SV=1	5.55	246062
0.00343545	Q28178	TSP1_BOVIN Thrombospondin-1 OS=Bos taurus OX=9913 GN=THBS1 PE=2 SV=2	4.73	127741
0.00338688	Q9N2I2	IPSP_BOVIN Plasma serine protease inhibitor OS=Bos taurus OX=9913 GN=SERPINA5 PE=1 SV=1	9.12	42495.2
0.00336076	Q3T0X6	RS16_BOVIN 40S ribosomal protein S16 OS=Bos taurus OX=9913 GN=RPS16 PE=2 SV=3	10.21	16445.3
0.00327177	Q2KIV9	C1QB_BOVIN Complement C1q subcomponent subunit B OS=Bos taurus OX=9913 GN=C1QB PE=1 SV=1	9.26	23937.1
0.00321521	Q8SPP7	PGRP1_BOVIN Peptidoglycan recognition protein 1 OS=Bos taurus OX=9913 GN=PGLYRP1 PE=1 SV=1	9.38	18808.3
0.00299372	Q3SZ54	IF4A1_BOVIN Eukaryotic initiation factor 4A-I OS=Bos taurus OX=9913 GN=EIF4A1 PE=2 SV=1	5.32	46022.7
0.00294818	Q58D62	FETUB_BOVIN Fetuin-B OS=Bos taurus OX=9913 GN=FETUB PE=1 SV=1	5.59	40845.9
0.00290091	P00735	THRB_BOVIN Prothrombin OS=Bos taurus OX=9913 GN=F2 PE=1 SV=2	5.4	65758.9
0.00285404	P17690	APOH_BOVIN Beta-2-glycoprotein 1 OS=Bos taurus OX=9913 GN=APOH PE=1 SV=4	8.55	36294.6
0.00276598	Q6B856	TBB2B_BOVIN Tubulin beta-2B chain OS=Bos taurus OX=9913 GN=TUBB2B PE=1 SV=2	4.78	49953.1
0.00264459	P02676	FIBB_BOVIN Fibrinogen beta chain OS=Bos taurus OX=9913 GN=FGB PE=1 SV=2	4.36	2364.51
0.00258906	Q3SZ57	FETA_BOVIN Alpha-fetoprotein OS=Bos taurus OX=9913 GN=AFP PE=2 SV=1	5.92	66412
0.00258657	Q27975	HS71A_BOVIN Heat shock 70 kDa protein 1A OS=Bos taurus OX=9913 GN=HSPA1A PE=1 SV=2	5.68	70127.3
0.00249068	P02666	CASB_BOVIN Beta-casein OS=Bos taurus OX=9913 GN=CSN2 PE=1 SV=2	5.13	23583.3
0.00239469	Q03763	DSG1_BOVIN Desmoglein-1 OS=Bos taurus OX=9913 GN=DSG1 PE=1 SV=1	4.79	106250
0.00231811	Q3SYU2	EF2_BOVIN Elongation factor 2 OS=Bos taurus OX=9913 GN=EEF2 PE=2 SV=3	6.41	95368.2
0.00224283	P63097	GNAI1_BOVIN Guanine nucleotide-binding protein G(i) subunit alpha-1 OS=Bos taurus OX=9913 GN=GNAI1 PE=1 SV=2	5.7	40229.9
0.00211632	P62808	H2B1_BOVIN Histone H2B type 1 OS=Bos taurus OX=9913 PE=1 SV=2	10.32	13775
0.00188196	P19120	HSP7C_BOVIN Heat shock cognate 71 kDa protein OS=Bos taurus OX=9913 GN=HSPA8 PE=1 SV=2	5.37	71109.3
0.00174347	P00978	AMBP_BOVIN Protein AMBP OS=Bos taurus OX=9913 GN=AMBP PE=1 SV=2	7.69	20801.8
0.00173864	P46193	ANXA1_BOVIN Annexin A1 OS=Bos taurus OX=9913 GN=ANXA1 PE=1 SV=2	6.41	38820.5
0.00170552	P12799	FIBG_BOVIN Fibrinogen gamma-B chain OS=Bos taurus OX=9913 GN=FGG PE=1 SV=1	5.46	47652
0.00156505	Q28065	C4BPA_BOVIN C4b-binding protein alpha chain OS=Bos taurus OX=9913 GN=C4BPA PE=2 SV=1	5.66	63526
0.00155766	P41361	ANT3_BOVIN Antithrombin-III OS=Bos taurus OX=9913 GN=SERPINC1 PE=1 SV=2	6.41	49061.1
0.0013819	Q3T052	ITIH4_BOVIN Inter-alpha-trypsin inhibitor heavy chain H4 OS=Bos taurus OX=9913 GN=ITIH4 PE=1 SV=1	5.99	98686.5
0.00134308	Q2YUK1	ATPB_STAAB ATP synthase subunit beta OS=Staphylococcus aureus (strain bovine RF122 / ET3-1) OX=273036 GN=atpD PE=3 SV=1	4.68	51400.3
0.00131886	P56652	ITIH3_BOVIN Inter-alpha-trypsin inhibitor heavy chain H3 OS=Bos taurus OX=9913 GN=ITIH3 PE=1 SV=2	5.17	68958
0.00131853	P00743	FA10_BOVIN Coagulation factor X OS=Bos taurus OX=9913 GN=F10 PE=1 SV=1	5.04	50166.9
0.0013145	Q28085	CFAH_BOVIN Complement factor H OS=Bos taurus OX=9913 GN=CFH PE=1 SV=3	6.33	138259
0.00130456	Q76LV2	HS90A_BOVIN Heat shock protein HSP 90-alpha OS=Bos taurus OX=9913 GN=HSP90AA1 PE=1 SV=3	4.92	84730.8
0.00129375	Q5EA61	KCRB_BOVIN Creatine kinase B-type OS=Bos taurus OX=9913 GN=CKB PE=1 SV=1	5.47	42719.4
0.00127622	P0C0S9	H2A1_BOVIN Histone H2A type 1 OS=Bos taurus OX=9913 PE=1 SV=2	10.9	13960.3
0.00120165	Q2TBU0	HPT_BOVIN Haptoglobin OS=Bos taurus OX=9913 GN=HP PE=2 SV=1	7.89	43032.9
0.00114682	Q3ZC89	MAP2_BOVIN Methionine aminopeptidase 2 OS=Bos taurus OX=9913 GN=METAP2 PE=2 SV=1	5.64	52680.4
0.00113472	Q2TLZ3	MACOI_BOVIN Macoilin OS=Bos taurus OX=9913 GN=MACO1 PE=2 SV=1	9.17	76117.5
0.00112626	P02070	HBB_BOVIN Hemoglobin subunit beta OS=Bos taurus OX=9913 GN=HBB PE=1 SV=1	7.02	15954.4
0.00111683	Q3SWY9	RAB28_BOVIN Ras-related protein Rab-28 OS=Bos taurus OX=9913 GN=RAB28 PE=2 SV=1	5.7	24313.7
0.00110344	A4IFA3	GT2D2_BOVIN General transcription factor II-I repeat domain-containing protein 2 OS=Bos taurus OX=9913 GN=GTF2IRD2 PE=2 SV=1	5.47	107016
0.00107256	P02672	FIBA_BOVIN Fibrinogen alpha chain OS=Bos taurus OX=9913 GN=FGA PE=1 SV=5	3.77	1891.92
0.00106133	P60661	MYL6_BOVIN Myosin light polypeptide 6 OS=Bos taurus OX=9913 GN=MYL6 PE=2 SV=2	4.56	16798.9
0.0010463	Q5E987	PSA5_BOVIN Proteasome subunit alpha type-5 OS=Bos taurus OX=9913 GN=PSMA5 PE=1 SV=1	4.74	26411
0.00103397	Q2YX57	PUR7_STAAB Phosphoribosylaminoimidazole-succinocarboxamide synthase OS=Staphylococcus aureus (strain bovine RF122 / ET3-1) OX=273036 GN=purC PE=3 SV=1	5.46	26726.6
0.00102498	P27479	LOX15_BOVIN Polyunsaturated fatty acid lipoxygenase ALOX15 OS=Bos taurus OX=9913 GN=ALOX15 PE=1 SV=3	6.09	75124.4
0.0010195	P79134	ANXA6_BOVIN Annexin A6 OS=Bos taurus OX=9913 GN=ANXA6 PE=1 SV=2	5.64	75776.2
0.000982091	Q2T9Z0	TRI17_BOVIN E3 ubiquitin-protein ligase TRIM17 OS=Bos taurus OX=9913 GN=TRIM17 PE=2 SV=1	7.5	54888.2
0.000901142	P21793	PGS2_BOVIN Decorin OS=Bos taurus OX=9913 GN=DCN PE=1 SV=2	8.74	36467
0.000829076	Q5E9V4	MT25B_BOVIN Methyltransferase-like protein 25B OS=Bos taurus OX=9913 GN=METTL25B PE=2 SV=1	8.22	53206.7
0.000813931	Q27972	CHAD_BOVIN Chondroadherin OS=Bos taurus OX=9913 GN=CHAD PE=1 SV=1	9.43	38443.1
0.000813071	Q2HJ49	MOES_BOVIN Moesin OS=Bos taurus OX=9913 GN=MSN PE=2 SV=3	5.9	67975.2
0.000802408	Q3T149	HSPB1_BOVIN Heat shock protein beta-1 OS=Bos taurus OX=9913 GN=HSPB1 PE=2 SV=1	5.98	22393.1
0.000790025	P12260	F13A_BOVIN Coagulation factor XIII A chain (Fragment) OS=Bos taurus OX=9913 GN=F13A1 PE=1 SV=2	n/a	n/a
0.000776231	A6QQM8	CCD42_BOVIN Coiled-coil domain-containing protein 42 OS=Bos taurus OX=9913 GN=CCDC42 PE=2 SV=1	9.04	37871.7
0.00076121	A7YY55	HACD3_BOVIN Very-long-chain (3R)-3-hydroxyacyl-CoA dehydratase 3 OS=Bos taurus OX=9913 GN=HACD3 PE=2 SV=1	8.98	43133.4
0.000672308	Q28161	PKP1_BOVIN Plakophilin-1 OS=Bos taurus OX=9913 GN=PKP1 PE=2 SV=1	9.18	80180.3
0.000658763	Q5E9L6	STK4_BOVIN Serine/threonine-protein kinase 4 OS=Bos taurus OX=9913 GN=STK4 PE=2 SV=1	4.95	55587.1
0.000649989	P07589	FINC_BOVIN Fibronectin OS=Bos taurus OX=9913 GN=FN1 PE=1 SV=4	5.28	269111
0.000635528	Q9N0H5	ARRC_BOVIN Arrestin-C OS=Bos taurus OX=9913 GN=ARR3 PE=1 SV=2	5.54	42880.3
0.000583904	Q9XSJ4	ENOA_BOVIN Alpha-enolase OS=Bos taurus OX=9913 GN=ENO1 PE=1 SV=4	6.37	47194.9
0.000537372	P01017	ANGT_BOVIN Angiotensinogen OS=Bos taurus OX=9913 GN=AGT PE=1 SV=2	6.49	49230.5
0.000524639	Q3T0K2	TCPG_BOVIN T-complex protein 1 subunit gamma OS=Bos taurus OX=9913 GN=CCT3 PE=1 SV=1	6.38	60585.9
0.000508281	Q0P5H1	PCYXL_BOVIN Prenylcysteine oxidase-like OS=Bos taurus OX=9913 GN=PCYOX1L PE=2 SV=1	7.07	52506.9
0.000493092	Q0P5A6	PSMD5_BOVIN 26S proteasome non-ATPase regulatory subunit 5 OS=Bos taurus OX=9913 GN=PSMD5 PE=2 SV=1	5.18	55911.3
0.00047093	Q0VD53	VP26A_BOVIN Vacuolar protein sorting-associated protein 26A OS=Bos taurus OX=9913 GN=VPS26A PE=2 SV=1	6.13	38155.9
0.000456941	G3MYZ3	AFAM_BOVIN Afamin OS=Bos taurus OX=9913 GN=AFM PE=1 SV=1	5.57	67068.8
0.000447239	Q0V8C2	EXOC3_BOVIN Exocyst complex component 3 OS=Bos taurus OX=9913 GN=EXOC3 PE=2 SV=1	5.83	85581.3
0.000426224	P80209	CATD_BOVIN Cathepsin D OS=Bos taurus OX=9913 GN=CTSD PE=1 SV=2	5.43	37711.1
0.000422102	P27214	ANX11_BOVIN Annexin A11 OS=Bos taurus OX=9913 GN=ANXA11 PE=1 SV=1	7.53	54018.2
0.000413245	Q27991	MYH10_BOVIN Myosin-10 OS=Bos taurus OX=9913 GN=MYH10 PE=2 SV=2	5.43	229099
0.000407193	Q29RL0	TBC31_BOVIN TBC1 domain family member 31 OS=Bos taurus OX=9913 GN=TBC1D31 PE=2 SV=1	8.58	123866
0.000389676	P02459	CO2A1_BOVIN Collagen alpha-1(II) chain OS=Bos taurus OX=9913 GN=COL2A1 PE=1 SV=4	8.38	123470
0.000381688	Q0VCX2	BIP_BOVIN Endoplasmic reticulum chaperone BiP OS=Bos taurus OX=9913 GN=HSPA5 PE=2 SV=1	5.01	70464.6
0.000371772	Q9BE40	MYH1_BOVIN Myosin-1 OS=Bos taurus OX=9913 GN=MYH1 PE=2 SV=2	5.57	222990
0.000363694	Q3T0G8	SYUA_BOVIN Alpha-synuclein OS=Bos taurus OX=9913 GN=SNCA PE=2 SV=1	4.69	14508.1
0.000359914	P81948	TBA4A_BOVIN Tubulin alpha-4A chain OS=Bos taurus OX=9913 GN=TUBA4A PE=1 SV=2	4.93	49924.4
0.000347395	P50448	F12AI_BOVIN Factor XIIa inhibitor OS=Bos taurus OX=9913 PE=1 SV=1	6.08	49273.3
0.00034145	Q29RQ1	CO7_BOVIN Complement component C7 OS=Bos taurus OX=9913 GN=C7 PE=2 SV=1	6.9	90602.2
0.000336858	Q3MHN5	VTDB_BOVIN Vitamin D-binding protein OS=Bos taurus OX=9913 GN=GC PE=2 SV=1	5.19	51531.7
0.000334263	P41541	USO1_BOVIN General vesicular transport factor p115 OS=Bos taurus OX=9913 GN=USO1 PE=1 SV=1	4.84	107515
0.000328429	P28800	A2AP_BOVIN Alpha-2-antiplasmin OS=Bos taurus OX=9913 GN=SERPINF2 PE=1 SV=2	5.71	50431.7
0.000306437	P55906	BGH3_BOVIN Transforming growth factor-beta-induced protein ig-h3 OS=Bos taurus OX=9913 GN=TGFBI PE=1 SV=2	6.69	72210.8
0.000300877	Q32LP0	URP2_BOVIN Fermitin family homolog 3 OS=Bos taurus OX=9913 GN=FERMT3 PE=2 SV=1	6.2	75782.6
0.000255145	Q705G8	VE1_BPV5 Replication protein E1 OS=Bovine papillomavirus type 5 OX=40537 GN=E1 PE=3 SV=1	6.63	70424.9
0.000234549	Q0VCX1	C1S_BOVIN Complement C1s subcomponent OS=Bos taurus OX=9913 GN=C1S PE=2 SV=2	4.97	74826
0.000221571	P13608	PGCA_BOVIN Aggrecan core protein OS=Bos taurus OX=9913 GN=ACAN PE=1 SV=3	4.15	244589
0.000183613	Q29423	CD44_BOVIN CD44 antigen OS=Bos taurus OX=9913 GN=CD44 PE=2 SV=1	6.44	37651.9
0.000154049	Q08DZ2	PRP4B_BOVIN Serine/threonine-protein kinase PRP4 homolog OS=Bos taurus OX=9913 GN=PRPF4B PE=2 SV=1	10.25	116515
0.00011128	Q76LV1	HS90B_BOVIN Heat shock protein HSP 90-beta OS=Bos taurus OX=9913 GN=HSP90AB1 PE=2 SV=3	4.96	83253.2
9.4507e-05	Q3B7M1	KLH36_BOVIN Kelch-like protein 36 OS=Bos taurus OX=9913 GN=KLHL36 PE=2 SV=1	5.74	69716.9
6.93972e-05	P03305	POLG_FMDVO Genome polyprotein OS=Foot-and-mouth disease virus (isolate Bovine/Germany/O1Kaufbeuren/1966 serotype O) OX=73482 PE=1 SV=1	6.27	258927

## Sheet: Table S2_Albumin NPs-avg_50 (2)
Table S2: Identified proteins in albumin NPs in high serum (50% fetal bovine serum)
Normalized spectra count	Accession number	Protein name	PI	MW (Da)
0.0809895	P02769	ALBU_BOVIN Albumin OS=Bos taurus OX=9913 GN=ALB PE=1 SV=4	5.6	66433
0.0706617	Q95121	PEDF_BOVIN Pigment epithelium-derived factor OS=Bos taurus OX=9913 GN=SERPINF1 PE=1 SV=1	6.31	44056.3
0.0686063	P01966	HBA_BOVIN Hemoglobin subunit alpha OS=Bos taurus OX=9913 GN=HBA PE=1 SV=2	8.19	15053.2
0.0462383	P02081	HBBF_BOVIN Hemoglobin fetal subunit beta OS=Bos taurus OX=9913 PE=1 SV=1	6.51	15859.2
0.0333854	Q29443	TRFE_BOVIN Serotransferrin OS=Bos taurus OX=9913 GN=TF PE=2 SV=1	6.5	75829.7
0.0296768	P19035	APOC3_BOVIN Apolipoprotein C-III OS=Bos taurus OX=9913 GN=APOC3 PE=1 SV=2	4.73	8217.01
0.0274868	P12763	FETUA_BOVIN Alpha-2-HS-glycoprotein OS=Bos taurus OX=9913 GN=AHSG PE=1 SV=2	5.1	36353.2
0.0255674	Q2UVX4	CO3_BOVIN Complement C3 OS=Bos taurus OX=9913 GN=C3 PE=1 SV=2	6.37	185047
0.025307	Q28178	TSP1_BOVIN Thrombospondin-1 OS=Bos taurus OX=9913 GN=THBS1 PE=2 SV=2	4.73	127741
0.0244422	P81644	APOA2_BOVIN Apolipoprotein A-II OS=Bos taurus OX=9913 GN=APOA2 PE=1 SV=2	5.34	8722.76
0.0162713	P34955	A1AT_BOVIN Alpha-1-antiproteinase OS=Bos taurus OX=9913 GN=SERPINA1 PE=1 SV=1	5.98	43693.9
0.0142858	Q32KY0	APOD_BOVIN Apolipoprotein D OS=Bos taurus OX=9913 GN=APOD PE=2 SV=1	4.86	19467.2
0.0138876	Q2KIS7	TETN_BOVIN Tetranectin OS=Bos taurus OX=9913 GN=CLEC3B PE=2 SV=1	5.69	19824.5
0.0138706	P81187	CFAB_BOVIN Complement factor B OS=Bos taurus OX=9913 GN=CFB PE=1 SV=2	7.68	82850.1
0.0135059	Q3SX14	GELS_BOVIN Gelsolin OS=Bos taurus OX=9913 GN=GSN PE=2 SV=1	5.54	80730.7
0.0130173	P19034	APOC2_BOVIN Apolipoprotein C-II OS=Bos taurus OX=9913 GN=APOC2 PE=1 SV=2	5.13	7944.97
0.0125958	Q3SZ57	FETA_BOVIN Alpha-fetoprotein OS=Bos taurus OX=9913 GN=AFP PE=2 SV=1	5.92	66412
0.0119558	Q03247	APOE_BOVIN Apolipoprotein E OS=Bos taurus OX=9913 GN=APOE PE=1 SV=1	5.44	34126.5
0.0112341	Q3SZR3	A1AG_BOVIN Alpha-1-acid glycoprotein OS=Bos taurus OX=9913 GN=ORM1 PE=2 SV=1	5.67	21253
0.00999727	P06868	PLMN_BOVIN Plasminogen OS=Bos taurus OX=9913 GN=PLG PE=1 SV=2	7.39	88393.5
0.00819845	Q5E9E3	C1QA_BOVIN Complement C1q subcomponent subunit A OS=Bos taurus OX=9913 GN=C1QA PE=2 SV=1	9.12	23519.3
0.00753488	Q2KJF1	A1BG_BOVIN Alpha-1B-glycoprotein OS=Bos taurus OX=9913 GN=A1BG PE=1 SV=1	5.37	51284.8
0.0074704	P62992	RS27A_BOVIN Ubiquitin-40S ribosomal protein S27a OS=Bos taurus OX=9913 GN=RPS27A PE=1 SV=2	6.56	8564.84
0.00743942	P02453	CO1A1_BOVIN Collagen alpha-1(I) chain OS=Bos taurus OX=9913 GN=COL1A1 PE=1 SV=3	9.28	94673
0.00702823	Q7SIH1	A2MG_BOVIN Alpha-2-macroglobulin OS=Bos taurus OX=9913 GN=A2M PE=1 SV=2	5.68	165053
0.00639471	P62833	RAP1A_BOVIN Ras-related protein Rap-1A OS=Bos taurus OX=9913 GN=RAP1A PE=1 SV=1	6.39	20647.7
0.00601799	P15497	APOA1_BOVIN Apolipoprotein A-I OS=Bos taurus OX=9913 GN=APOA1 PE=1 SV=3	5.36	27549.1
0.00557423	P02676	FIBB_BOVIN Fibrinogen beta chain OS=Bos taurus OX=9913 GN=FGB PE=1 SV=2	4.36	2364.51
0.00510744	P02662	CASA1_BOVIN Alpha-S1-casein OS=Bos taurus OX=9913 GN=CSN1S1 PE=1 SV=2	4.91	22974.9
0.00489625	P00432	CATA_BOVIN Catalase OS=Bos taurus OX=9913 GN=CAT PE=1 SV=3	6.82	59784.1
0.0047156	P00735	THRB_BOVIN Prothrombin OS=Bos taurus OX=9913 GN=F2 PE=1 SV=2	5.4	65758.9
0.00464256	Q8SPP7	PGRP1_BOVIN Peptidoglycan recognition protein 1 OS=Bos taurus OX=9913 GN=PGLYRP1 PE=1 SV=1	9.38	18808.3
0.00454201	Q58D62	FETUB_BOVIN Fetuin-B OS=Bos taurus OX=9913 GN=FETUB PE=1 SV=1	5.59	40845.9
0.00448404	P17690	APOH_BOVIN Beta-2-glycoprotein 1 OS=Bos taurus OX=9913 GN=APOH PE=1 SV=4	8.55	36294.6
0.00435241	Q29RU4	CO6_BOVIN Complement component C6 OS=Bos taurus OX=9913 GN=C6 PE=2 SV=1	6.59	102164
0.00430038	Q3MHN2	CO9_BOVIN Complement component C9 OS=Bos taurus OX=9913 GN=C9 PE=2 SV=1	5.57	59705.6
0.00422171	P46193	ANXA1_BOVIN Annexin A1 OS=Bos taurus OX=9913 GN=ANXA1 PE=1 SV=2	6.41	38820.5
0.00401293	Q3Y5Z3	ADIPO_BOVIN Adiponectin OS=Bos taurus OX=9913 GN=ADIPOQ PE=1 SV=1	5.33	24391
0.00400652	Q2KIV9	C1QB_BOVIN Complement C1q subcomponent subunit B OS=Bos taurus OX=9913 GN=C1QB PE=1 SV=1	9.26	23937.1
0.00393807	Q28085	CFAH_BOVIN Complement factor H OS=Bos taurus OX=9913 GN=CFH PE=1 SV=3	6.33	138259
0.00388338	Q08DP2	BORC5_BOVIN BLOC-1-related complex subunit 5 OS=Bos taurus OX=9913 GN=BORCS5 PE=2 SV=1	6	22069.1
0.00385612	Q8SPJ1	PLAK_BOVIN Junction plakoglobin OS=Bos taurus OX=9913 GN=JUP PE=2 SV=1	5.75	81820.8
0.00381379	P07106	ACBD5_BOVIN Acyl-CoA-binding domain-containing protein 5 OS=Bos taurus OX=9913 GN=ACBD5 PE=2 SV=2	5.44	59652.6
0.00325159	P81287	ANXA5_BOVIN Annexin A5 OS=Bos taurus OX=9913 GN=ANXA5 PE=1 SV=3	4.85	35957.7
0.00314746	P02465	CO1A2_BOVIN Collagen alpha-2(I) chain OS=Bos taurus OX=9913 GN=COL1A2 PE=1 SV=2	9.93	93415.3
0.00295516	P0C0S9	H2A1_BOVIN Histone H2A type 1 OS=Bos taurus OX=9913 PE=1 SV=2	10.9	13960.3
0.00286576	P12799	FIBG_BOVIN Fibrinogen gamma-B chain OS=Bos taurus OX=9913 GN=FGG PE=1 SV=1	5.46	47652
0.00286283	P63097	GNAI1_BOVIN Guanine nucleotide-binding protein G(i) subunit alpha-1 OS=Bos taurus OX=9913 GN=GNAI1 PE=1 SV=2	5.7	40229.9
0.00274138	Q17QW1	BORG5_BOVIN Cdc42 effector protein 1 OS=Bos taurus OX=9913 GN=CDC42EP1 PE=2 SV=1	7.86	37333.6
0.00262363	Q2YUD1	AGRB_STAAB Accessory gene regulator protein B OS=Staphylococcus aureus (strain bovine RF122 / ET3-1) OX=273036 GN=agrB PE=3 SV=1	9.54	21678.3
0.00257039	A6H769	RS7_BOVIN 40S ribosomal protein S7 OS=Bos taurus OX=9913 GN=RPS7 PE=1 SV=1	10.09	22126.8
0.00249239	P00978	AMBP_BOVIN Protein AMBP OS=Bos taurus OX=9913 GN=AMBP PE=1 SV=2	7.69	20801.8
0.00248709	O46375	TTHY_BOVIN Transthyretin OS=Bos taurus OX=9913 GN=TTR PE=1 SV=1	5.91	13557.3
0.00215883	Q9N2I2	IPSP_BOVIN Plasma serine protease inhibitor OS=Bos taurus OX=9913 GN=SERPINA5 PE=1 SV=1	9.12	42495.2
0.00194762	Q29RQ1	CO7_BOVIN Complement component C7 OS=Bos taurus OX=9913 GN=C7 PE=2 SV=1	6.9	90602.2
0.00190397	P07589	FINC_BOVIN Fibronectin OS=Bos taurus OX=9913 GN=FN1 PE=1 SV=4	5.28	269111
0.00174883	Q2T9Z0	TRI17_BOVIN E3 ubiquitin-protein ligase TRIM17 OS=Bos taurus OX=9913 GN=TRIM17 PE=2 SV=1	7.5	54888.2
0.00173995	Q5EAC7	CPIN1_BOVIN Anamorsin OS=Bos taurus OX=9913 GN=CIAPIN1 PE=2 SV=1	5.23	33204.8
0.00169696	P35445	COMP_BOVIN Cartilage oligomeric matrix protein OS=Bos taurus OX=9913 GN=COMP PE=1 SV=2	4.36	80469
0.00167816	Q24K22	HGFL_BOVIN Hepatocyte growth factor-like protein OS=Bos taurus OX=9913 GN=MST1 PE=2 SV=1	8.42	78006.3
0.0016205	P02666	CASB_BOVIN Beta-casein OS=Bos taurus OX=9913 GN=CSN2 PE=1 SV=2	5.13	23583.3
0.00160064	P27479	LOX15_BOVIN Polyunsaturated fatty acid lipoxygenase ALOX15 OS=Bos taurus OX=9913 GN=ALOX15 PE=1 SV=3	6.09	75124.4
0.00156497	P02672	FIBA_BOVIN Fibrinogen alpha chain OS=Bos taurus OX=9913 GN=FGA PE=1 SV=5	3.77	1891.92
0.00151952	P04272	ANXA2_BOVIN Annexin A2 OS=Bos taurus OX=9913 GN=ANXA2 PE=1 SV=2	6.9	38480.9
0.00148493	Q3T0E2	SYCP3_BOVIN Synaptonemal complex protein 3 OS=Bos taurus OX=9913 GN=SYCP3 PE=2 SV=1	8.43	26341
0.00147079	Q28107	FA5_BOVIN Coagulation factor V OS=Bos taurus OX=9913 GN=F5 PE=1 SV=1	5.55	246062
0.00142148	P55906	BGH3_BOVIN Transforming growth factor-beta-induced protein ig-h3 OS=Bos taurus OX=9913 GN=TGFBI PE=1 SV=2	6.69	72210.8
0.00139346	Q28065	C4BPA_BOVIN C4b-binding protein alpha chain OS=Bos taurus OX=9913 GN=C4BPA PE=2 SV=1	5.66	63526
0.00136624	Q27975	HS71A_BOVIN Heat shock 70 kDa protein 1A OS=Bos taurus OX=9913 GN=HSPA1A PE=1 SV=2	5.68	70127.3
0.00134692	A6H768	GALK1_BOVIN Galactokinase OS=Bos taurus OX=9913 GN=GALK1 PE=2 SV=2	5.77	42227
0.00123461	Q3T052	ITIH4_BOVIN Inter-alpha-trypsin inhibitor heavy chain H4 OS=Bos taurus OX=9913 GN=ITIH4 PE=1 SV=1	5.99	98686.5
0.00122585	P02070	HBB_BOVIN Hemoglobin subunit beta OS=Bos taurus OX=9913 GN=HBB PE=1 SV=1	7.02	15954.4
0.00122278	P00743	FA10_BOVIN Coagulation factor X OS=Bos taurus OX=9913 GN=F10 PE=1 SV=1	5.04	50166.9
0.00115518	P60661	MYL6_BOVIN Myosin light polypeptide 6 OS=Bos taurus OX=9913 GN=MYL6 PE=2 SV=2	4.56	16798.9
0.00112082	P41361	ANT3_BOVIN Antithrombin-III OS=Bos taurus OX=9913 GN=SERPINC1 PE=1 SV=2	6.41	49061.1
0.00109961	P50448	F12AI_BOVIN Factor XIIa inhibitor OS=Bos taurus OX=9913 PE=1 SV=1	6.08	49273.3
0.00109448	P62935	PPIA_BOVIN Peptidyl-prolyl cis-trans isomerase A OS=Bos taurus OX=9913 GN=PPIA PE=1 SV=2	8.34	17869.3
0.0010899	P13214	ANXA4_BOVIN Annexin A4 OS=Bos taurus OX=9913 GN=ANXA4 PE=1 SV=2	5.53	35757.6
0.00108615	P27214	ANX11_BOVIN Annexin A11 OS=Bos taurus OX=9913 GN=ANXA11 PE=1 SV=1	7.53	54018.2
0.00103878	P19120	HSP7C_BOVIN Heat shock cognate 71 kDa protein OS=Bos taurus OX=9913 GN=HSPA8 PE=1 SV=2	5.37	71109.3
0.00103229	Q32LP0	URP2_BOVIN Fermitin family homolog 3 OS=Bos taurus OX=9913 GN=FERMT3 PE=2 SV=1	6.2	75782.6
0.00100758	Q95JC7	AAAT_BOVIN Neutral amino acid transporter B(0) OS=Bos taurus OX=9913 GN=SLC1A5 PE=2 SV=1	5.55	56447.6
0.000970896	P55252	HPLN1_BOVIN Hyaluronan and proteoglycan link protein 1 OS=Bos taurus OX=9913 GN=HAPLN1 PE=2 SV=1	7.66	38568.4
0.000933315	P01017	ANGT_BOVIN Angiotensinogen OS=Bos taurus OX=9913 GN=AGT PE=1 SV=2	6.49	49230.5
0.000885906	Q27972	CHAD_BOVIN Chondroadherin OS=Bos taurus OX=9913 GN=CHAD PE=1 SV=1	9.43	38443.1
0.000823186	P26892	IL6_BOVIN Interleukin-6 OS=Bos taurus OX=9913 GN=IL6 PE=2 SV=1	6.63	20671.9
0.000785826	P56652	ITIH3_BOVIN Inter-alpha-trypsin inhibitor heavy chain H3 OS=Bos taurus OX=9913 GN=ITIH3 PE=1 SV=2	5.17	68958
0.000765487	P81948	TBA4A_BOVIN Tubulin alpha-4A chain OS=Bos taurus OX=9913 GN=TUBA4A PE=1 SV=2	4.93	49924.4
0.000738083	A4IFA3	GT2D2_BOVIN General transcription factor II-I repeat domain-containing protein 2 OS=Bos taurus OX=9913 GN=GTF2IRD2 PE=2 SV=1	5.47	107016
0.00071645	Q3MHN5	VTDB_BOVIN Vitamin D-binding protein OS=Bos taurus OX=9913 GN=GC PE=2 SV=1	5.19	51531.7
0.000692455	Q76LV2	HS90A_BOVIN Heat shock protein HSP 90-alpha OS=Bos taurus OX=9913 GN=HSP90AA1 PE=1 SV=3	4.92	84730.8
0.000661053	Q3T0X5	PSA1_BOVIN Proteasome subunit alpha type-1 OS=Bos taurus OX=9913 GN=PSMA1 PE=1 SV=1	6.15	29585.6
0.000594084	Q5E9V4	MT25B_BOVIN Methyltransferase-like protein 25B OS=Bos taurus OX=9913 GN=METTL25B PE=2 SV=1	8.22	53206.7
0.000551569	P02459	CO2A1_BOVIN Collagen alpha-1(II) chain OS=Bos taurus OX=9913 GN=COL2A1 PE=1 SV=4	8.38	123470
0.000550598	Q9N0H5	ARRC_BOVIN Arrestin-C OS=Bos taurus OX=9913 GN=ARR3 PE=1 SV=2	5.54	42880.3
0.000522735	Q03763	DSG1_BOVIN Desmoglein-1 OS=Bos taurus OX=9913 GN=DSG1 PE=1 SV=1	4.79	106250
0.000515295	P79134	ANXA6_BOVIN Annexin A6 OS=Bos taurus OX=9913 GN=ANXA6 PE=1 SV=2	5.64	75776.2
0.00048784	Q28161	PKP1_BOVIN Plakophilin-1 OS=Bos taurus OX=9913 GN=PKP1 PE=2 SV=1	9.18	80180.3
0.000458638	Q0V8C2	EXOC3_BOVIN Exocyst complex component 3 OS=Bos taurus OX=9913 GN=EXOC3 PE=2 SV=1	5.83	85581.3
0.000457812	Q5EA61	KCRB_BOVIN Creatine kinase B-type OS=Bos taurus OX=9913 GN=CKB PE=1 SV=1	5.47	42719.4
0.000351838	Q5E9L6	STK4_BOVIN Serine/threonine-protein kinase 4 OS=Bos taurus OX=9913 GN=STK4 PE=2 SV=1	4.95	55587.1
0.000342645	Q3SWW8	TSP4_BOVIN Thrombospondin-4 OS=Bos taurus OX=9913 GN=THBS4 PE=2 SV=1	4.41	103545
0.00031735	Q08DA1	AT1A1_BOVIN Sodium/potassium-transporting ATPase subunit alpha-1 OS=Bos taurus OX=9913 GN=ATP1A1 PE=1 SV=1	5.32	112170
0.000313619	P62808	H2B1_BOVIN Histone H2B type 1 OS=Bos taurus OX=9913 PE=1 SV=2	10.32	13775
0.000304616	Q3B7L5	FLCN_BOVIN Folliculin OS=Bos taurus OX=9913 GN=FLCN PE=2 SV=1	6.05	64204.2
0.000287717	Q2HJ49	MOES_BOVIN Moesin OS=Bos taurus OX=9913 GN=MSN PE=2 SV=3	5.9	67975.2
0.000284908	Q2YXC9	UVRC_STAAB UvrABC system protein C OS=Staphylococcus aureus (strain bovine RF122 / ET3-1) OX=273036 GN=uvrC PE=3 SV=1	9.34	68644.3
0.000281153	G3MYZ3	AFAM_BOVIN Afamin OS=Bos taurus OX=9913 GN=AFM PE=1 SV=1	5.57	67068.8
0.000260305	P07224	PROS_BOVIN Vitamin K-dependent protein S OS=Bos taurus OX=9913 GN=PROS1 PE=1 SV=1	5.01	70564.1
0.000256937	Q2TLZ3	MACOI_BOVIN Macoilin OS=Bos taurus OX=9913 GN=MACO1 PE=2 SV=1	9.17	76117.5
0.000256097	Q27991	MYH10_BOVIN Myosin-10 OS=Bos taurus OX=9913 GN=MYH10 PE=2 SV=2	5.43	229099
0.00025529	Q0VCX1	C1S_BOVIN Complement C1s subcomponent OS=Bos taurus OX=9913 GN=C1S PE=2 SV=2	4.97	74826
0.000220644	Q2YXD1	MUTS2_STAAB Endonuclease MutS2 OS=Staphylococcus aureus (strain bovine RF122 / ET3-1) OX=273036 GN=mutS2 PE=3 SV=1	5.91	88638.3
0.000215233	Q9BE40	MYH1_BOVIN Myosin-1 OS=Bos taurus OX=9913 GN=MYH1 PE=2 SV=2	5.57	222990
0.00015877	P13608	PGCA_BOVIN Aggrecan core protein OS=Bos taurus OX=9913 GN=ACAN PE=1 SV=3	4.15	244589
0.000127692	A7MB40	F193B_BOVIN Protein FAM193B OS=Bos taurus OX=9913 GN=FAM193B PE=2 SV=1	7.52	88041
0.000124568	Q5E9E2	MYL9_BOVIN Myosin regulatory light polypeptide 9 OS=Bos taurus OX=9913 GN=MYL9 PE=2 SV=3	4.65	19734
0.00011198	Q9TTK4	LYST_BOVIN Lysosomal-trafficking regulator OS=Bos taurus OX=9913 GN=LYST PE=1 SV=1	5.97	428601
0.000102079	P49951	CLH1_BOVIN Clathrin heavy chain 1 OS=Bos taurus OX=9913 GN=CLTC PE=1 SV=1	5.48	191457
8.92781e-05	Q0VCM5	ITIH1_BOVIN Inter-alpha-trypsin inhibitor heavy chain H1 OS=Bos taurus OX=9913 GN=ITIH1 PE=1 SV=1	7.52	71584.1

## Sheet: Table S3_Liposomes-avg-15 (2)
Table S3: Identified proteins in liposomes in low serum (15% fetal bovine serum)
Normalized spectra count	Accession number	Protein name	PI	MW (Da)
0.122603	P02769	ALBU_BOVIN Albumin OS=Bos taurus OX=9913 GN=ALB PE=1 SV=4	5.6	66433
0.104349	Q2UVX4	CO3_BOVIN Complement C3 OS=Bos taurus OX=9913 GN=C3 PE=1 SV=2	6.37	185047
0.0775918	Q7SIH1	A2MG_BOVIN Alpha-2-macroglobulin OS=Bos taurus OX=9913 GN=A2M PE=1 SV=2	5.68	165053
0.0523694	P56652	ITIH3_BOVIN Inter-alpha-trypsin inhibitor heavy chain H3 OS=Bos taurus OX=9913 GN=ITIH3 PE=1 SV=2	5.17	68958
0.0461475	P34955	A1AT_BOVIN Alpha-1-antiproteinase OS=Bos taurus OX=9913 GN=SERPINA1 PE=1 SV=1	5.98	43693.9
0.0389743	Q0VCM5	ITIH1_BOVIN Inter-alpha-trypsin inhibitor heavy chain H1 OS=Bos taurus OX=9913 GN=ITIH1 PE=1 SV=1	7.52	71584.1
0.0341998	P07589	FINC_BOVIN Fibronectin OS=Bos taurus OX=9913 GN=FN1 PE=1 SV=4	5.28	269111
0.0325311	P12763	FETUA_BOVIN Alpha-2-HS-glycoprotein OS=Bos taurus OX=9913 GN=AHSG PE=1 SV=2	5.1	36353.2
0.0236058	Q29443	TRFE_BOVIN Serotransferrin OS=Bos taurus OX=9913 GN=TF PE=2 SV=1	6.5	75829.7
0.021655	P15497	APOA1_BOVIN Apolipoprotein A-I OS=Bos taurus OX=9913 GN=APOA1 PE=1 SV=3	5.36	27549.1
0.0161336	P00735	THRB_BOVIN Prothrombin OS=Bos taurus OX=9913 GN=F2 PE=1 SV=2	5.4	65758.9
0.0150349	Q28178	TSP1_BOVIN Thrombospondin-1 OS=Bos taurus OX=9913 GN=THBS1 PE=2 SV=2	4.73	127741
0.012446	Q28107	FA5_BOVIN Coagulation factor V OS=Bos taurus OX=9913 GN=F5 PE=1 SV=1	5.55	246062
0.0115178	Q3T052	ITIH4_BOVIN Inter-alpha-trypsin inhibitor heavy chain H4 OS=Bos taurus OX=9913 GN=ITIH4 PE=1 SV=1	5.99	98686.5
0.0107962	P01267	THYG_BOVIN Thyroglobulin OS=Bos taurus OX=9913 GN=TG PE=1 SV=1	5.5	301219
0.0106229	Q3SZ57	FETA_BOVIN Alpha-fetoprotein OS=Bos taurus OX=9913 GN=AFP PE=2 SV=1	5.92	66412
0.0105932	P02081	HBBF_BOVIN Hemoglobin fetal subunit beta OS=Bos taurus OX=9913 PE=1 SV=1	6.51	15859.2
0.00943855	P50448	F12AI_BOVIN Factor XIIa inhibitor OS=Bos taurus OX=9913 PE=1 SV=1	6.08	49273.3
0.00905958	Q95121	PEDF_BOVIN Pigment epithelium-derived factor OS=Bos taurus OX=9913 GN=SERPINF1 PE=1 SV=1	6.31	44056.3
0.00872921	P01966	HBA_BOVIN Hemoglobin subunit alpha OS=Bos taurus OX=9913 GN=HBA PE=1 SV=2	8.19	15053.2
0.00851104	P17697	CLUS_BOVIN Clusterin OS=Bos taurus OX=9913 GN=CLU PE=1 SV=1	5.72	48969.2
0.00757144	Q2KJF1	A1BG_BOVIN Alpha-1B-glycoprotein OS=Bos taurus OX=9913 GN=A1BG PE=1 SV=1	5.37	51284.8
0.00737662	Q03247	APOE_BOVIN Apolipoprotein E OS=Bos taurus OX=9913 GN=APOE PE=1 SV=1	5.44	34126.5
0.00715626	P00978	AMBP_BOVIN Protein AMBP OS=Bos taurus OX=9913 GN=AMBP PE=1 SV=2	7.69	20801.8
0.00715189	Q3SX14	GELS_BOVIN Gelsolin OS=Bos taurus OX=9913 GN=GSN PE=2 SV=1	5.54	80730.7
0.00686522	P41361	ANT3_BOVIN Antithrombin-III OS=Bos taurus OX=9913 GN=SERPINC1 PE=1 SV=2	6.41	49061.1
0.00671282	Q58D62	FETUB_BOVIN Fetuin-B OS=Bos taurus OX=9913 GN=FETUB PE=1 SV=1	5.59	40845.9
0.00643627	Q3Y5Z3	ADIPO_BOVIN Adiponectin OS=Bos taurus OX=9913 GN=ADIPOQ PE=1 SV=1	5.33	24391
0.0062936	P02672	FIBA_BOVIN Fibrinogen alpha chain OS=Bos taurus OX=9913 GN=FGA PE=1 SV=5	3.77	1891.92
0.00597305	A7E3W2	LG3BP_BOVIN Galectin-3-binding protein OS=Bos taurus OX=9913 GN=LGALS3BP PE=1 SV=1	5.25	60016.2
0.00589891	P81644	APOA2_BOVIN Apolipoprotein A-II OS=Bos taurus OX=9913 GN=APOA2 PE=1 SV=2	5.34	8722.76
0.00589871	Q17QW1	BORG5_BOVIN Cdc42 effector protein 1 OS=Bos taurus OX=9913 GN=CDC42EP1 PE=2 SV=1	7.86	37333.6
0.00588068	E1BF81	CBG_BOVIN Corticosteroid-binding globulin OS=Bos taurus OX=9913 GN=SERPINA6 PE=3 SV=1	5.54	42622.5
0.00582995	Q05443	LUM_BOVIN Lumican OS=Bos taurus OX=9913 GN=LUM PE=1 SV=1	5.93	37001.3
0.00560294	Q3MHN2	CO9_BOVIN Complement component C9 OS=Bos taurus OX=9913 GN=C9 PE=2 SV=1	5.57	59705.6
0.00548104	P07224	PROS_BOVIN Vitamin K-dependent protein S OS=Bos taurus OX=9913 GN=PROS1 PE=1 SV=1	5.01	70564.1
0.00535148	Q3SZR3	A1AG_BOVIN Alpha-1-acid glycoprotein OS=Bos taurus OX=9913 GN=ORM1 PE=2 SV=1	5.67	21253
0.00517256	P55906	BGH3_BOVIN Transforming growth factor-beta-induced protein ig-h3 OS=Bos taurus OX=9913 GN=TGFBI PE=1 SV=2	6.69	72210.8
0.0048066	P28800	A2AP_BOVIN Alpha-2-antiplasmin OS=Bos taurus OX=9913 GN=SERPINF2 PE=1 SV=2	5.71	50431.7
0.00469774	P35445	COMP_BOVIN Cartilage oligomeric matrix protein OS=Bos taurus OX=9913 GN=COMP PE=1 SV=2	4.36	80469
0.00465388	P01017	ANGT_BOVIN Angiotensinogen OS=Bos taurus OX=9913 GN=AGT PE=1 SV=2	6.49	49230.5
0.00458122	G3MYZ3	AFAM_BOVIN Afamin OS=Bos taurus OX=9913 GN=AFM PE=1 SV=1	5.57	67068.8
0.00443675	P31836	NCAM1_BOVIN Neural cell adhesion molecule 1 OS=Bos taurus OX=9913 GN=NCAM1 PE=1 SV=1	4.85	91727.9
0.00405412	P00743	FA10_BOVIN Coagulation factor X OS=Bos taurus OX=9913 GN=F10 PE=1 SV=1	5.04	50166.9
0.00398742	P00745	PROC_BOVIN Vitamin K-dependent protein C (Fragment) OS=Bos taurus OX=9913 GN=PROC PE=1 SV=1	5.39	47062.4
0.00394752	Q3SWW8	TSP4_BOVIN Thrombospondin-4 OS=Bos taurus OX=9913 GN=THBS4 PE=2 SV=1	4.41	103545
0.00385228	P01044	KNG1_BOVIN Kininogen-1 OS=Bos taurus OX=9913 GN=KNG1 PE=1 SV=1	6.05	66845.5
0.00353875	P01045	KNG2_BOVIN Kininogen-2 OS=Bos taurus OX=9913 GN=KNG2 PE=1 SV=1	6	66665.4
0.00347679	Q28085	CFAH_BOVIN Complement factor H OS=Bos taurus OX=9913 GN=CFH PE=1 SV=3	6.33	138259
0.00334826	P81187	CFAB_BOVIN Complement factor B OS=Bos taurus OX=9913 GN=CFB PE=1 SV=2	7.68	82850.1
0.0031722	Q76LV2	HS90A_BOVIN Heat shock protein HSP 90-alpha OS=Bos taurus OX=9913 GN=HSP90AA1 PE=1 SV=3	4.92	84730.8
0.00303278	Q9N2I2	IPSP_BOVIN Plasma serine protease inhibitor OS=Bos taurus OX=9913 GN=SERPINA5 PE=1 SV=1	9.12	42495.2
0.00279651	Q0VCX1	C1S_BOVIN Complement C1s subcomponent OS=Bos taurus OX=9913 GN=C1S PE=2 SV=2	4.97	74826
0.00275654	Q76LV1	HS90B_BOVIN Heat shock protein HSP 90-beta OS=Bos taurus OX=9913 GN=HSP90AB1 PE=2 SV=3	4.96	83253.2
0.00272632	Q0VCX2	BIP_BOVIN Endoplasmic reticulum chaperone BiP OS=Bos taurus OX=9913 GN=HSPA5 PE=2 SV=1	5.01	70464.6
0.00270491	P00741	FA9_BOVIN Coagulation factor IX OS=Bos taurus OX=9913 GN=F9 PE=1 SV=2	5.72	49291.3
0.00269375	Q3SZV7	HEMO_BOVIN Hemopexin OS=Bos taurus OX=9913 GN=HPX PE=2 SV=1	7.1	49688.1
0.00268148	Q32LP0	URP2_BOVIN Fermitin family homolog 3 OS=Bos taurus OX=9913 GN=FERMT3 PE=2 SV=1	6.2	75782.6
0.00264931	O46375	TTHY_BOVIN Transthyretin OS=Bos taurus OX=9913 GN=TTR PE=1 SV=1	5.91	13557.3
0.00263322	Q32PJ2	APOA4_BOVIN Apolipoprotein A-IV OS=Bos taurus OX=9913 GN=APOA4 PE=2 SV=1	5.29	41032.3
0.00252079	Q32KY0	APOD_BOVIN Apolipoprotein D OS=Bos taurus OX=9913 GN=APOD PE=2 SV=1	4.86	19467.2
0.00250158	P06868	PLMN_BOVIN Plasminogen OS=Bos taurus OX=9913 GN=PLG PE=1 SV=2	7.39	88393.5
0.00237164	P80012	VWF_BOVIN von Willebrand factor (Fragment) OS=Bos taurus OX=9913 GN=VWF PE=1 SV=2	4.74	18759.7
0.00226187	Q8SPJ1	PLAK_BOVIN Junction plakoglobin OS=Bos taurus OX=9913 GN=JUP PE=2 SV=1	5.75	81820.8
0.00224053	P80109	PHLD_BOVIN Phosphatidylinositol-glycan-specific phospholipase D OS=Bos taurus OX=9913 GN=GPLD1 PE=1 SV=1	6.06	90002.6
0.00223086	P13605	FMOD_BOVIN Fibromodulin OS=Bos taurus OX=9913 GN=FMOD PE=1 SV=2	5.57	41092.3
0.00222139	P10096	G3P_BOVIN Glyceraldehyde-3-phosphate dehydrogenase OS=Bos taurus OX=9913 GN=GAPDH PE=1 SV=4	8.52	35736.9
0.00221224	Q3MHL4	SAHH_BOVIN Adenosylhomocysteinase OS=Bos taurus OX=9913 GN=AHCY PE=2 SV=3	5.88	47506.8
0.00205927	P12799	FIBG_BOVIN Fibrinogen gamma-B chain OS=Bos taurus OX=9913 GN=FGG PE=1 SV=1	5.46	47652
0.00203124	P81948	TBA4A_BOVIN Tubulin alpha-4A chain OS=Bos taurus OX=9913 GN=TUBA4A PE=1 SV=2	4.93	49924.4
0.00197739	Q0VCP3	OLFL3_BOVIN Olfactomedin-like protein 3 OS=Bos taurus OX=9913 GN=OLFML3 PE=2 SV=1	6.18	43603.4
0.00188631	Q28065	C4BPA_BOVIN C4b-binding protein alpha chain OS=Bos taurus OX=9913 GN=C4BPA PE=2 SV=1	5.66	63526
0.0018627	P12260	F13A_BOVIN Coagulation factor XIII A chain (Fragment) OS=Bos taurus OX=9913 GN=F13A1 PE=1 SV=2	n/a	n/a
0.00179185	Q3MHN5	VTDB_BOVIN Vitamin D-binding protein OS=Bos taurus OX=9913 GN=GC PE=2 SV=1	5.19	51531.7
0.0017594	P00432	CATA_BOVIN Catalase OS=Bos taurus OX=9913 GN=CAT PE=1 SV=3	6.82	59784.1
0.00168662	P19035	APOC3_BOVIN Apolipoprotein C-III OS=Bos taurus OX=9913 GN=APOC3 PE=1 SV=2	4.73	8217.01
0.00164944	P02465	CO1A2_BOVIN Collagen alpha-2(I) chain OS=Bos taurus OX=9913 GN=COL1A2 PE=1 SV=2	9.93	93415.3
0.00164274	P01030	CO4_BOVIN Complement C4 (Fragments) OS=Bos taurus OX=9913 GN=C4 PE=1 SV=2	5.55	67995.4
0.00163304	Q2KJH4	WDR1_BOVIN WD repeat-containing protein 1 OS=Bos taurus OX=9913 GN=WDR1 PE=2 SV=3	6.24	66257.6
0.00162746	Q5E9Z2	HABP2_BOVIN Hyaluronan-binding protein 2 OS=Bos taurus OX=9913 GN=HABP2 PE=2 SV=1	5.94	32715.4
0.00158776	Q27967	SPP24_BOVIN Secreted phosphoprotein 24 OS=Bos taurus OX=9913 GN=SPP2 PE=1 SV=2	7.85	20479.8
0.00155583	P02676	FIBB_BOVIN Fibrinogen beta chain OS=Bos taurus OX=9913 GN=FGB PE=1 SV=2	4.36	2364.51
0.0015114	P13213	SPRC_BOVIN SPARC OS=Bos taurus OX=9913 GN=SPARC PE=1 SV=2	4.64	32678.7
0.00142494	P02453	CO1A1_BOVIN Collagen alpha-1(I) chain OS=Bos taurus OX=9913 GN=COL1A1 PE=1 SV=3	9.28	94673
0.00141616	Q2KJD0	TBB5_BOVIN Tubulin beta-5 chain OS=Bos taurus OX=9913 GN=TUBB5 PE=2 SV=1	4.78	49670.8
0.00139475	Q58CQ9	VNN1_BOVIN Pantetheinase OS=Bos taurus OX=9913 GN=VNN1 PE=1 SV=1	5.07	52431.3
0.00138729	Q9TTE1	SPA31_BOVIN Serpin A3-1 OS=Bos taurus OX=9913 GN=SERPINA3-1 PE=1 SV=3	5.41	43640.8
0.00136951	Q9TT36	THBG_BOVIN Thyroxine-binding globulin OS=Bos taurus OX=9913 GN=SERPINA7 PE=2 SV=1	5.4	44366.1
0.00133591	Q0VCG9	PTX3_BOVIN Pentraxin-related protein PTX3 OS=Bos taurus OX=9913 GN=PTX3 PE=2 SV=1	5.02	40190.5
0.00129893	Q27991	MYH10_BOVIN Myosin-10 OS=Bos taurus OX=9913 GN=MYH10 PE=2 SV=2	5.43	229099
0.00129257	Q03763	DSG1_BOVIN Desmoglein-1 OS=Bos taurus OX=9913 GN=DSG1 PE=1 SV=1	4.79	106250
0.00126707	P00744	PROZ_BOVIN Vitamin K-dependent protein Z OS=Bos taurus OX=9913 GN=PROZ PE=1 SV=1	6.09	43112.7
0.0012515	Q2KIV9	C1QB_BOVIN Complement C1q subcomponent subunit B OS=Bos taurus OX=9913 GN=C1QB PE=1 SV=1	9.26	23937.1
0.00124878	Q28017	PAFA_BOVIN Platelet-activating factor acetylhydrolase OS=Bos taurus OX=9913 GN=PLA2G7 PE=2 SV=1	5.96	47814.2
0.00122848	Q9TTJ5	RGN_BOVIN Regucalcin OS=Bos taurus OX=9913 GN=RGN PE=2 SV=1	5.54	33307.8
0.00112935	P19120	HSP7C_BOVIN Heat shock cognate 71 kDa protein OS=Bos taurus OX=9913 GN=HSPA8 PE=1 SV=2	5.37	71109.3
0.00110878	Q9BGI3	PRDX2_BOVIN Peroxiredoxin-2 OS=Bos taurus OX=9913 GN=PRDX2 PE=2 SV=1	5.37	21946
0.00109963	P79134	ANXA6_BOVIN Annexin A6 OS=Bos taurus OX=9913 GN=ANXA6 PE=1 SV=2	5.64	75776.2
0.00107874	P13608	PGCA_BOVIN Aggrecan core protein OS=Bos taurus OX=9913 GN=ACAN PE=1 SV=3	4.15	244589
0.00101075	O77742	OMD_BOVIN Osteomodulin OS=Bos taurus OX=9913 GN=OMD PE=1 SV=1	5.2	45889.6
0.000989664	P81287	ANXA5_BOVIN Annexin A5 OS=Bos taurus OX=9913 GN=ANXA5 PE=1 SV=3	4.85	35957.7
0.000989664	Q27972	CHAD_BOVIN Chondroadherin OS=Bos taurus OX=9913 GN=CHAD PE=1 SV=1	9.43	38443.1
0.000936928	Q95M18	ENPL_BOVIN Endoplasmin OS=Bos taurus OX=9913 GN=HSP90B1 PE=2 SV=1	4.73	90135.8
0.000898002	P22457	FA7_BOVIN Coagulation factor VII OS=Bos taurus OX=9913 GN=F7 PE=1 SV=2	4.54	16871.5
0.000888009	Q3T0X5	PSA1_BOVIN Proteasome subunit alpha type-1 OS=Bos taurus OX=9913 GN=PSMA1 PE=1 SV=1	6.15	29585.6
0.000848048	Q2TBU0	HPT_BOVIN Haptoglobin OS=Bos taurus OX=9913 GN=HP PE=2 SV=1	7.89	43032.9
0.000842209	Q3B7N2	ACTN1_BOVIN Alpha-actinin-1 OS=Bos taurus OX=9913 GN=ACTN1 PE=2 SV=1	5.25	102980
0.000835335	P62261	1433E_BOVIN 14-3-3 protein epsilon OS=Bos taurus OX=9913 GN=YWHAE PE=2 SV=1	4.63	29173.9
0.000817232	A6H768	GALK1_BOVIN Galactokinase OS=Bos taurus OX=9913 GN=GALK1 PE=2 SV=2	5.77	42227
0.00081217	Q5E9E3	C1QA_BOVIN Complement C1q subcomponent subunit A OS=Bos taurus OX=9913 GN=C1QA PE=2 SV=1	9.12	23519.3
0.000782201	Q0P569	NUCB1_BOVIN Nucleobindin-1 OS=Bos taurus OX=9913 GN=NUCB1 PE=1 SV=1	5.05	52483.3
0.000774998	Q3ZEJ6	SPA33_BOVIN Serpin A3-3 OS=Bos taurus OX=9913 GN=SERPINA3-3 PE=1 SV=2	5.73	43768.1
0.000773055	P69678	CUTA_BOVIN Protein CutA OS=Bos taurus OX=9913 GN=CUTA PE=1 SV=1	5.87	15766.2
0.000763321	P18902	RET4_BOVIN Retinol-binding protein 4 OS=Bos taurus OX=9913 GN=RBP4 PE=1 SV=1	5.44	21068.6
0.00076079	Q58DU5	PSA3_BOVIN Proteasome subunit alpha type-3 OS=Bos taurus OX=9913 GN=PSMA3 PE=1 SV=3	5.19	28274
0.000760272	Q3ZBG0	PSA7_BOVIN Proteasome subunit alpha type-7 OS=Bos taurus OX=9913 GN=PSMA7 PE=1 SV=1	8.59	27868.9
0.000739708	Q32KL2	PSB5_BOVIN Proteasome subunit beta type-5 OS=Bos taurus OX=9913 GN=PSMB5 PE=1 SV=1	8.33	22474.3
0.000726408	Q17QH6	COL11_BOVIN Collectin-11 OS=Bos taurus OX=9913 GN=COLEC11 PE=2 SV=1	5.16	26174.4
0.000708892	P38657	PDIA3_BOVIN Protein disulfide-isomerase A3 OS=Bos taurus OX=9913 GN=PDIA3 PE=2 SV=1	5.78	54398.4
0.000707787	Q29RQ1	CO7_BOVIN Complement component C7 OS=Bos taurus OX=9913 GN=C7 PE=2 SV=1	6.9	90602.2
0.000706423	P02070	HBB_BOVIN Hemoglobin subunit beta OS=Bos taurus OX=9913 GN=HBB PE=1 SV=1	7.02	15954.4
0.000683915	Q2YDE4	PSA6_BOVIN Proteasome subunit alpha type-6 OS=Bos taurus OX=9913 GN=PSMA6 PE=1 SV=1	6.34	27399.5
0.000673922	Q2KJH9	AL9A1_BOVIN 4-trimethylaminobutyraldehyde dehydrogenase OS=Bos taurus OX=9913 GN=ALDH9A1 PE=2 SV=1	5.84	53845.9
0.000670968	P04272	ANXA2_BOVIN Annexin A2 OS=Bos taurus OX=9913 GN=ANXA2 PE=1 SV=2	6.9	38480.9
0.000670615	Q29423	CD44_BOVIN CD44 antigen OS=Bos taurus OX=9913 GN=CD44 PE=2 SV=1	6.44	37651.9
0.000637009	A7MBJ5	CAND1_BOVIN Cullin-associated NEDD8-dissociated protein 1 OS=Bos taurus OX=9913 GN=CAND1 PE=2 SV=1	5.52	136245
0.000633114	P19034	APOC2_BOVIN Apolipoprotein C-II OS=Bos taurus OX=9913 GN=APOC2 PE=1 SV=2	5.13	7944.97
0.000617612	P63103	1433Z_BOVIN 14-3-3 protein zeta/delta OS=Bos taurus OX=9913 GN=YWHAZ PE=1 SV=1	4.73	27745.1
0.000612291	P08169	MPRI_BOVIN Cation-independent mannose-6-phosphate receptor OS=Bos taurus OX=9913 GN=IGF2R PE=1 SV=2	5.57	269955
0.000592345	Q2KJ39	RCN3_BOVIN Reticulocalbin-3 OS=Bos taurus OX=9913 GN=RCN3 PE=2 SV=1	4.7	35307.3
0.000590621	P53710	ITA2_BOVIN Integrin alpha-2 (Fragment) OS=Bos taurus OX=9913 GN=ITGA2 PE=2 SV=1	5.47	127030
0.000549813	P46193	ANXA1_BOVIN Annexin A1 OS=Bos taurus OX=9913 GN=ANXA1 PE=1 SV=2	6.41	38820.5
0.000549813	P27214	ANX11_BOVIN Annexin A11 OS=Bos taurus OX=9913 GN=ANXA11 PE=1 SV=1	7.53	54018.2
0.000549813	Q0V8C2	EXOC3_BOVIN Exocyst complex component 3 OS=Bos taurus OX=9913 GN=EXOC3 PE=2 SV=1	5.83	85581.3
0.000549813	Q2T9Z0	TRI17_BOVIN E3 ubiquitin-protein ligase TRIM17 OS=Bos taurus OX=9913 GN=TRIM17 PE=2 SV=1	7.5	54888.2
0.000549813	Q24K22	HGFL_BOVIN Hepatocyte growth factor-like protein OS=Bos taurus OX=9913 GN=MST1 PE=2 SV=1	8.42	78006.3
0.000549234	Q3T108	PSB4_BOVIN Proteasome subunit beta type-4 OS=Bos taurus OX=9913 GN=PSMB4 PE=1 SV=1	5.45	24361.8
0.00054787	Q95122	CD14_BOVIN Monocyte differentiation antigen CD14 OS=Bos taurus OX=9913 GN=CD14 PE=2 SV=2	5.24	37470.9
0.000542031	P49951	CLH1_BOVIN Clathrin heavy chain 1 OS=Bos taurus OX=9913 GN=CLTC PE=1 SV=1	5.48	191457
0.000539242	Q3SZ54	IF4A1_BOVIN Eukaryotic initiation factor 4A-I OS=Bos taurus OX=9913 GN=EIF4A1 PE=2 SV=1	5.32	46022.7
0.000537752	Q95M17	CHIA_BOVIN Acidic mammalian chitinase OS=Bos taurus OX=9913 GN=CHIA PE=1 SV=1	5.26	49954.7
0.000535416	P05307	PDIA1_BOVIN Protein disulfide-isomerase OS=Bos taurus OX=9913 GN=P4HB PE=1 SV=1	4.73	55166
0.000534732	A7YY55	HACD3_BOVIN Very-long-chain (3R)-3-hydroxyacyl-CoA dehydratase 3 OS=Bos taurus OX=9913 GN=HACD3 PE=2 SV=1	8.98	43133.4
0.000533568	P33433	HRG_BOVIN Histidine-rich glycoprotein (Fragments) OS=Bos taurus OX=9913 GN=HRG PE=1 SV=1	7.06	44470.6
0.000529249	Q2KIS7	TETN_BOVIN Tetranectin OS=Bos taurus OX=9913 GN=CLEC3B PE=2 SV=1	5.69	19824.5
0.000505636	P02662	CASA1_BOVIN Alpha-S1-casein OS=Bos taurus OX=9913 GN=CSN1S1 PE=1 SV=2	4.91	22974.9
0.000505118	Q5EA61	KCRB_BOVIN Creatine kinase B-type OS=Bos taurus OX=9913 GN=CKB PE=1 SV=1	5.47	42719.4
0.000504083	P68250	1433B_BOVIN 14-3-3 protein beta/alpha OS=Bos taurus OX=9913 GN=YWHAB PE=1 SV=2	4.8	28081.4
0.00049928	Q3T054	RAN_BOVIN GTP-binding nuclear protein Ran OS=Bos taurus OX=9913 GN=RAN PE=2 SV=3	7.2	24291.9
0.000493441	Q3SZP2	MARE2_BOVIN Microtubule-associated protein RP/EB family member 2 OS=Bos taurus OX=9913 GN=MAPRE2 PE=2 SV=1	5.36	36988.3
0.000489287	Q5E9F7	COF1_BOVIN Cofilin-1 OS=Bos taurus OX=9913 GN=CFL1 PE=2 SV=3	8.21	18387.4
0.00048812	P68103	EF1A1_BOVIN Elongation factor 1-alpha 1 OS=Bos taurus OX=9913 GN=EEF1A1 PE=1 SV=1	9.1	50009.7
0.000477316	Q9XSJ4	ENOA_BOVIN Alpha-enolase OS=Bos taurus OX=9913 GN=ENO1 PE=1 SV=4	6.37	47194.9
0.00047482	Q29RU4	CO6_BOVIN Complement component C6 OS=Bos taurus OX=9913 GN=C6 PE=2 SV=1	6.59	102164
0.00047479	A6QQ07	BTD_BOVIN Biotinidase OS=Bos taurus OX=9913 GN=BTD PE=2 SV=1	5.74	55796.4
0.000462367	O46415	FRIL_BOVIN Ferritin light chain OS=Bos taurus OX=9913 GN=FTL PE=2 SV=3	5.88	19856.5
0.000449843	Q9N0T5	IF4E_BOVIN Eukaryotic translation initiation factor 4E OS=Bos taurus OX=9913 GN=EIF4E PE=2 SV=2	5.8	24948
0.000446794	Q5E9B1	LDHB_BOVIN L-lactate dehydrogenase B chain OS=Bos taurus OX=9913 GN=LDHB PE=2 SV=4	6.03	36592.4
0.000445305	Q5E9B7	CLIC1_BOVIN Chloride intracellular channel protein 1 OS=Bos taurus OX=9913 GN=CLIC1 PE=2 SV=3	5.17	26860.6
0.00043985	Q5EAC7	CPIN1_BOVIN Anamorsin OS=Bos taurus OX=9913 GN=CIAPIN1 PE=2 SV=1	5.23	33204.8
0.00043985	A1A4I4	PKN1_BOVIN Serine/threonine-protein kinase N1 OS=Bos taurus OX=9913 GN=PKN1 PE=2 SV=1	6.09	104002
0.000437907	P52193	CALR_BOVIN Calreticulin OS=Bos taurus OX=9913 GN=CALR PE=1 SV=2	4.31	46381.4
0.00043739	P62833	RAP1A_BOVIN Ras-related protein Rap-1A OS=Bos taurus OX=9913 GN=RAP1A PE=1 SV=1	6.39	20647.7
0.00042902	O02659	MBL2_BOVIN Mannose-binding protein C OS=Bos taurus OX=9913 GN=MBL PE=2 SV=1	5.11	24402.4
0.000424381	P98140	FA12_BOVIN Coagulation factor XII OS=Bos taurus OX=9913 GN=F12 PE=1 SV=2	5.05	26185.5
0.000406833	Q08E20	ESTD_BOVIN S-formylglutathione hydrolase OS=Bos taurus OX=9913 GN=ESD PE=2 SV=1	6.54	31416.7
0.000404561	Q3SWY2	ILK_BOVIN Integrin-linked protein kinase OS=Bos taurus OX=9913 GN=ILK PE=2 SV=1	8.3	51447.3
0.000401512	Q3ZCK9	PSA4_BOVIN Proteasome subunit alpha type-4 OS=Bos taurus OX=9913 GN=PSMA4 PE=1 SV=1	7.58	29483.8
0.000398463	P07106	ACBD5_BOVIN Acyl-CoA-binding domain-containing protein 5 OS=Bos taurus OX=9913 GN=ACBD5 PE=2 SV=2	5.44	59652.6
0.00039126	Q29RU2	OIT3_BOVIN Oncoprotein-induced transcript 3 protein OS=Bos taurus OX=9913 GN=OIT3 PE=2 SV=1	5.25	58489.9
0.000373745	P53712	ITB1_BOVIN Integrin beta-1 OS=Bos taurus OX=9913 GN=ITGB1 PE=1 SV=3	5.29	85868.2
0.000367354	P27479	LOX15_BOVIN Polyunsaturated fatty acid lipoxygenase ALOX15 OS=Bos taurus OX=9913 GN=ALOX15 PE=1 SV=3	6.09	75124.4
0.000367354	O46414	FRIH_BOVIN Ferritin heavy chain OS=Bos taurus OX=9913 GN=FTH1 PE=2 SV=3	5.54	21051.5
0.000359278	Q3SZV3	EF1G_BOVIN Elongation factor 1-gamma OS=Bos taurus OX=9913 GN=EEF1G PE=2 SV=1	6.17	50246.9
0.000359019	P37141	GPX3_BOVIN Glutathione peroxidase 3 OS=Bos taurus OX=9913 GN=GPX3 PE=2 SV=2	6	23119.3
0.000355971	P80227	ACPH_BOVIN Acylamino-acid-releasing enzyme OS=Bos taurus OX=9913 GN=APEH PE=1 SV=2	5.18	81093.4
0.000348768	P0C0S9	H2A1_BOVIN Histone H2A type 1 OS=Bos taurus OX=9913 PE=1 SV=2	10.9	13960.3
0.000348673	P68252	1433G_BOVIN 14-3-3 protein gamma OS=Bos taurus OX=9913 GN=YWHAG PE=1 SV=2	4.8	28252.6
0.000344489	A7YWP4	HUTH_BOVIN Histidine ammonia-lyase OS=Bos taurus OX=9913 GN=HAL PE=2 SV=1	6.24	72291
0.000344489	Q92176	COR1A_BOVIN Coronin-1A OS=Bos taurus OX=9913 GN=CORO1A PE=1 SV=3	6.25	50848
0.000337091	Q1RMS2	PYRG2_BOVIN CTP synthase 2 OS=Bos taurus OX=9913 GN=CTPS2 PE=2 SV=1	6.06	65481.2
0.000331934	Q2KJ63	KLKB1_BOVIN Plasma kallikrein OS=Bos taurus OX=9913 GN=KLKB1 PE=2 SV=1	6.42	27455.2
0.000329888	Q27975	HS71A_BOVIN Heat shock 70 kDa protein 1A OS=Bos taurus OX=9913 GN=HSPA1A PE=1 SV=2	5.68	70127.3
0.000329888	Q0P5H1	PCYXL_BOVIN Prenylcysteine oxidase-like OS=Bos taurus OX=9913 GN=PCYOX1L PE=2 SV=1	7.07	52506.9
0.000329888	Q2HJ49	MOES_BOVIN Moesin OS=Bos taurus OX=9913 GN=MSN PE=2 SV=3	5.9	67975.2
0.000329888	Q9N0H5	ARRC_BOVIN Arrestin-C OS=Bos taurus OX=9913 GN=ARR3 PE=1 SV=2	5.54	42880.3
0.000329888	A2VDN6	SF3A1_BOVIN Splicing factor 3A subunit 1 OS=Bos taurus OX=9913 GN=SF3A1 PE=2 SV=1	5.15	88786.1
0.000325315	P17690	APOH_BOVIN Beta-2-glycoprotein 1 OS=Bos taurus OX=9913 GN=APOH PE=1 SV=4	8.55	36294.6
0.000325315	P55252	HPLN1_BOVIN Hyaluronan and proteoglycan link protein 1 OS=Bos taurus OX=9913 GN=HAPLN1 PE=2 SV=1	7.66	38568.4
0.000308806	Q2TBI0	LBP_BOVIN Lipopolysaccharide-binding protein OS=Bos taurus OX=9913 GN=LBP PE=2 SV=1	6.65	51264.2
0.000306016	Q5KR47	TPM3_BOVIN Tropomyosin alpha-3 chain OS=Bos taurus OX=9913 GN=TPM3 PE=2 SV=1	4.68	32818.8
0.000300178	Q3T0G8	SYUA_BOVIN Alpha-synuclein OS=Bos taurus OX=9913 GN=SNCA PE=2 SV=1	4.69	14508.1
0.000294857	P19858	LDHA_BOVIN L-lactate dehydrogenase A chain OS=Bos taurus OX=9913 GN=LDHA PE=2 SV=2	8.17	36466.4
0.000294339	A3KMV5	UBA1_BOVIN Ubiquitin-like modifier-activating enzyme 1 OS=Bos taurus OX=9913 GN=UBA1 PE=2 SV=1	5.5	117699
0.000288759	Q27970	CAN1_BOVIN Calpain-1 catalytic subunit OS=Bos taurus OX=9913 GN=CAPN1 PE=1 SV=3	5.42	82207.4
0.000285711	P62157	CALM_BOVIN Calmodulin OS=Bos taurus OX=9913 GN=CALM PE=1 SV=2	4.09	16706.4
0.000277341	P07688	CATB_BOVIN Cathepsin B OS=Bos taurus OX=9913 GN=CTSB PE=1 SV=5	5.15	27462.6
0.000277341	Q0II73	CBPO_BOVIN Carboxypeptidase O OS=Bos taurus OX=9913 GN=CPO PE=2 SV=1	6.11	38753.6
0.000277341	Q3T0E5	APMAP_BOVIN Adipocyte plasma membrane-associated protein OS=Bos taurus OX=9913 GN=APMAP PE=2 SV=1	6.57	46091
0.000266572	A6H767	NP1L1_BOVIN Nucleosome assembly protein 1-like 1 OS=Bos taurus OX=9913 GN=NAP1L1 PE=2 SV=1	4.34	44860.5
0.000263782	P26892	IL6_BOVIN Interleukin-6 OS=Bos taurus OX=9913 GN=IL6 PE=2 SV=1	6.63	20671.9
0.000257391	Q9TTK4	LYST_BOVIN Lysosomal-trafficking regulator OS=Bos taurus OX=9913 GN=LYST PE=1 SV=1	5.97	428601
0.000247857	Q5E9K0	PSB2_BOVIN Proteasome subunit beta type-2 OS=Bos taurus OX=9913 GN=PSMB2 PE=1 SV=1	6.52	22896.3
0.000247857	P50227	ST1A1_BOVIN Sulfotransferase 1A1 OS=Bos taurus OX=9913 GN=SULT1A1 PE=1 SV=2	6.52	34183.6
0.000243672	Q32S24	COBA2_BOVIN Collagen alpha-2(XI) chain OS=Bos taurus OX=9913 GN=COL11A2 PE=3 SV=1	5.96	169140
0.000243672	A7YWG4	GGH_BOVIN Gamma-glutamyl hydrolase OS=Bos taurus OX=9913 GN=GGH PE=2 SV=1	8.96	33330.3
0.000243672	Q3ZC84	CNDP2_BOVIN Cytosolic non-specific dipeptidase OS=Bos taurus OX=9913 GN=CNDP2 PE=2 SV=1	5.59	52655.4
0.000241854	P24591	IBP1_BOVIN Insulin-like growth factor-binding protein 1 OS=Bos taurus OX=9913 GN=IGFBP1 PE=2 SV=2	6.38	26206.9
0.000239487	P55918	MFAP4_BOVIN Microfibril-associated glycoprotein 4 OS=Bos taurus OX=9913 GN=MFAP4 PE=1 SV=2	5.21	26541.6
0.000238805	P62808	H2B1_BOVIN Histone H2B type 1 OS=Bos taurus OX=9913 PE=1 SV=2	10.32	13775
0.000238805	Q95116	TSP2_BOVIN Thrombospondin-2 OS=Bos taurus OX=9913 GN=THBS2 PE=2 SV=2	4.64	127800
0.000235756	O02675	DPYL2_BOVIN Dihydropyrimidinase-related protein 2 OS=Bos taurus OX=9913 GN=DPYSL2 PE=1 SV=1	5.95	62277.6
0.000219925	P63097	GNAI1_BOVIN Guanine nucleotide-binding protein G(i) subunit alpha-1 OS=Bos taurus OX=9913 GN=GNAI1 PE=1 SV=2	5.7	40229.9
0.000219925	Q29RL0	TBC31_BOVIN TBC1 domain family member 31 OS=Bos taurus OX=9913 GN=TBC1D31 PE=2 SV=1	8.58	123866
0.000219925	Q5E9E2	MYL9_BOVIN Myosin regulatory light polypeptide 9 OS=Bos taurus OX=9913 GN=MYL9 PE=2 SV=3	4.65	19734
0.000219925	Q3SYR5	APOC4_BOVIN Apolipoprotein C-IV OS=Bos taurus OX=9913 GN=APOC4 PE=2 SV=1	9.07	11653.2
0.000219925	P80209	CATD_BOVIN Cathepsin D OS=Bos taurus OX=9913 GN=CTSD PE=1 SV=2	5.43	37711.1
0.000215352	P68509	1433F_BOVIN 14-3-3 protein eta OS=Bos taurus OX=9913 GN=YWHAH PE=1 SV=2	4.81	28080.5
0.000210779	P62871	GBB1_BOVIN Guanine nucleotide-binding protein G(I)/G(S)/G(T) subunit beta-1 OS=Bos taurus OX=9913 GN=GNB1 PE=1 SV=3	5.6	37245.8
0.000207989	Q08DK9	PWP3A_BOVIN PWWP domain-containing DNA repair factor 3A OS=Bos taurus OX=9913 GN=PWWP3A PE=2 SV=1	8.82	71108.6
0.0002052	Q5E9F8	H33_BOVIN Histone H3.3 OS=Bos taurus OX=9913 GN=H3-3A PE=1 SV=3	11.27	15196.7
0.0002052	Q9TU47	IF6_BOVIN Eukaryotic translation initiation factor 6 OS=Bos taurus OX=9913 GN=EIF6 PE=2 SV=2	4.61	26513
0.0002052	P79342	S10AD_BOVIN Protein S100-A13 OS=Bos taurus OX=9913 GN=S100A13 PE=3 SV=2	5.5	11198.9
0.000202151	P02459	CO2A1_BOVIN Collagen alpha-1(II) chain OS=Bos taurus OX=9913 GN=COL2A1 PE=1 SV=4	8.38	123470
0.000201633	Q32L89	PIGH_BOVIN Phosphatidylinositol N-acetylglucosaminyltransferase subunit H OS=Bos taurus OX=9913 GN=PIGH PE=2 SV=1	6.19	21005.7
0.000201633	A2VE10	GOLM2_BOVIN Protein GOLM2 OS=Bos taurus OX=9913 GN=GOLM2 PE=2 SV=1	6.33	43199.4
0.000201633	Q3ZBD9	MARE1_BOVIN Microtubule-associated protein RP/EB family member 1 OS=Bos taurus OX=9913 GN=MAPRE1 PE=2 SV=3	5.2	29982
0.000199102	P81282	CSPG2_BOVIN Versican core protein OS=Bos taurus OX=9913 GN=VCAN PE=1 SV=2	4.46	367778
0.000197448	Q2KIT0	HP20_BOVIN Protein HP-20 homolog OS=Bos taurus OX=9913 PE=2 SV=1	8.86	18889.8
0.000197448	Q2KJC6	METK1_BOVIN S-adenosylmethionine synthase isoform type-1 OS=Bos taurus OX=9913 GN=MAT1A PE=2 SV=1	5.51	43760.8
0.000197448	Q1JQ94	RTL8_BOVIN Retrotransposon Gag-like protein 8 OS=Bos taurus OX=9913 GN=RTL8A PE=3 SV=1	5.39	13246.4
0.000196312	O62698	PGH2_BOVIN Prostaglandin G/H synthase 2 OS=Bos taurus OX=9913 GN=PTGS2 PE=2 SV=2	7.13	67537.4
0.000193652	P14568	ASSY_BOVIN Argininosuccinate synthase OS=Bos taurus OX=9913 GN=ASS1 PE=2 SV=1	7.15	46417.2
0.000193652	Q5EA62	FBLN5_BOVIN Fibulin-5 OS=Bos taurus OX=9913 GN=FBLN5 PE=2 SV=1	4.48	47769.4
0.000193523	Q3T0Y5	PSA2_BOVIN Proteasome subunit alpha type-2 OS=Bos taurus OX=9913 GN=PSMA2 PE=1 SV=3	7.12	25767.4
0.000193264	Q3SYU2	EF2_BOVIN Elongation factor 2 OS=Bos taurus OX=9913 GN=EEF2 PE=2 SV=3	6.41	95368.2
0.000193264	Q95140	RLA0_BOVIN 60S acidic ribosomal protein P0 OS=Bos taurus OX=9913 GN=RPLP0 PE=2 SV=3	5.7	34370.6
0.000184894	Q3T0K2	TCPG_BOVIN T-complex protein 1 subunit gamma OS=Bos taurus OX=9913 GN=CCT3 PE=1 SV=1	6.38	60585.9
0.000184894	A5D7D1	ACTN4_BOVIN Alpha-actinin-4 OS=Bos taurus OX=9913 GN=ACTN4 PE=2 SV=1	5.27	104928
0.000184894	Q27971	CAN2_BOVIN Calpain-2 catalytic subunit OS=Bos taurus OX=9913 GN=CAPN2 PE=2 SV=2	4.84	78081.1
0.000184894	A6H6Z7	TPX2_BOVIN Targeting protein for Xklp2 OS=Bos taurus OX=9913 GN=TPX2 PE=2 SV=1	9.4	81592.5
0.000184894	Q2KJ93	CDC42_BOVIN Cell division control protein 42 homolog OS=Bos taurus OX=9913 GN=CDC42 PE=1 SV=1	6.16	20933.2
0.000184894	Q3T102	EIF3E_BOVIN Eukaryotic translation initiation factor 3 subunit E OS=Bos taurus OX=9913 GN=EIF3E PE=2 SV=1	5.72	52059.6
0.000184894	Q3ZC91	ASM3A_BOVIN Acid sphingomyelinase-like phosphodiesterase 3a OS=Bos taurus OX=9913 GN=SMPDL3A PE=2 SV=1	8.84	48927
0.000174384	Q5E987	PSA5_BOVIN Proteasome subunit alpha type-5 OS=Bos taurus OX=9913 GN=PSMA5 PE=1 SV=1	4.74	26411
0.000171335	P42916	CL43_BOVIN Collectin-43 OS=Bos taurus OX=9913 GN=CL43 PE=1 SV=2	5.04	31448.8
0.000171335	Q5I2E5	FCN2_BOVIN Ficolin-2 OS=Bos taurus OX=9913 GN=FCN2 PE=2 SV=1	7.75	32667.3
0.000162707	P33672	PSB3_BOVIN Proteasome subunit beta type-3 OS=Bos taurus OX=9913 GN=PSMB3 PE=1 SV=3	6.13	22861.7
0.000162707	Q5E947	PRDX1_BOVIN Peroxiredoxin-1 OS=Bos taurus OX=9913 GN=PRDX1 PE=2 SV=1	8.59	22078.3
0.000162707	A6H7B5	CSN3_BOVIN COP9 signalosome complex subunit 3 OS=Bos taurus OX=9913 GN=COPS3 PE=2 SV=1	6.2	47667.8
0.000160371	A4FV54	RAB8A_BOVIN Ras-related protein Rab-8A OS=Bos taurus OX=9913 GN=RAB8A PE=2 SV=1	9.14	23358.8
0.000156186	P62992	RS27A_BOVIN Ubiquitin-40S ribosomal protein S27a OS=Bos taurus OX=9913 GN=RPS27A PE=1 SV=2	6.56	8564.84
0.000156186	P22226	CTHL1_BOVIN Cathelicidin-1 OS=Bos taurus OX=9913 GN=CATHL1 PE=1 SV=2	11.53	1485.92
0.000147428	Q5E9R3	EHD1_BOVIN EH domain-containing protein 1 OS=Bos taurus OX=9913 GN=EHD1 PE=1 SV=1	6.35	60681.9
0.00014704	P60661	MYL6_BOVIN Myosin light polypeptide 6 OS=Bos taurus OX=9913 GN=MYL6 PE=2 SV=2	4.56	16798.9
0.00014704	Q0VD19	ASM_BOVIN Sphingomyelin phosphodiesterase OS=Bos taurus OX=9913 GN=SMPD1 PE=2 SV=1	5.87	65185.4
0.00014704	P48616	VIME_BOVIN Vimentin OS=Bos taurus OX=9913 GN=VIM PE=1 SV=3	5.05	53596.6
0.000142855	A3KN12	PUR8_BOVIN Adenylosuccinate lyase OS=Bos taurus OX=9913 GN=ADSL PE=2 SV=1	6.47	55352.7
0.00013773	Q71SP7	FAS_BOVIN Fatty acid synthase OS=Bos taurus OX=9913 GN=FASN PE=1 SV=1	6.23	274554
0.000134681	Q58DK5	HEM2_BOVIN Delta-aminolevulinic acid dehydratase OS=Bos taurus OX=9913 GN=ALAD PE=2 SV=1	6.51	36081.5
0.000131891	Q3ZC42	ADHX_BOVIN Alcohol dehydrogenase class-3 OS=Bos taurus OX=9913 GN=ADH5 PE=2 SV=1	7.6	39545.9
0.000109963	Q08DP2	BORC5_BOVIN BLOC-1-related complex subunit 5 OS=Bos taurus OX=9913 GN=BORCS5 PE=2 SV=1	6	22069.1
0.000109963	Q8SPP7	PGRP1_BOVIN Peptidoglycan recognition protein 1 OS=Bos taurus OX=9913 GN=PGLYRP1 PE=1 SV=1	9.38	18808.3
0.000109963	Q3SWY9	RAB28_BOVIN Ras-related protein Rab-28 OS=Bos taurus OX=9913 GN=RAB28 PE=2 SV=1	5.7	24313.7
0.000109963	Q1RMU7	SESQ2_BOVIN Sesquipedalian-2 OS=Bos taurus OX=9913 GN=PHETA2 PE=2 SV=1	7.05	28626.3
0.000109963	Q3SZ79	LIPC_BOVIN Hepatic triacylglycerol lipase OS=Bos taurus OX=9913 GN=LIPC PE=2 SV=1	9.23	54452.4
0.000109963	P62935	PPIA_BOVIN Peptidyl-prolyl cis-trans isomerase A OS=Bos taurus OX=9913 GN=PPIA PE=1 SV=2	8.34	17869.3
0.000109963	A7MB40	F193B_BOVIN Protein FAM193B OS=Bos taurus OX=9913 GN=FAM193B PE=2 SV=1	7.52	88041
0.000109963	E1BGN7	CGAS_BOVIN Cyclic GMP-AMP synthase OS=Bos taurus OX=9913 GN=CGAS PE=3 SV=1	9.44	55953.1
0.000109963	Q28084	CO4A3_BOVIN Collagen alpha-3(IV) chain (Fragment) OS=Bos taurus OX=9913 GN=COL4A3 PE=1 SV=1	n/a	n/a
0.000109963	Q8SQA4	AGRE5_BOVIN Adhesion G protein-coupled receptor E5 OS=Bos taurus OX=9913 GN=ADGRE5 PE=2 SV=1	8.24	77610.7
0.000109963	Q9TTA5	SMAL1_BOVIN SWI/SNF-related matrix-associated actin-dependent regulator of chromatin subfamily A-like protein 1 OS=Bos taurus OX=9913 GN=SMARCAL1 PE=2 SV=2	9.33	104645
0.00010539	Q0P5A6	PSMD5_BOVIN 26S proteasome non-ATPase regulatory subunit 5 OS=Bos taurus OX=9913 GN=PSMD5 PE=2 SV=1	5.18	55911.3
0.00010539	Q3ZCF2	MED10_BOVIN Mediator of RNA polymerase II transcription subunit 10 OS=Bos taurus OX=9913 GN=MED10 PE=2 SV=1	5.82	15688
0.000101205	Q2TLZ3	MACOI_BOVIN Macoilin OS=Bos taurus OX=9913 GN=MACO1 PE=2 SV=1	9.17	76117.5
0.000101205	P41541	USO1_BOVIN General vesicular transport factor p115 OS=Bos taurus OX=9913 GN=USO1 PE=1 SV=1	4.84	107515
0.000101205	A6QLY7	PBIP1_BOVIN Pre-B-cell leukemia transcription factor-interacting protein 1 OS=Bos taurus OX=9913 GN=PBXIP1 PE=2 SV=1	4.99	80257.5
0.000101205	Q52PG9	KCND1_BOVIN Potassium voltage-gated channel subfamily D member 1 OS=Bos taurus OX=9913 GN=KCND1 PE=2 SV=1	8.79	71377.6
0.000101205	Q5EA89	FA76A_BOVIN Protein FAM76A OS=Bos taurus OX=9913 GN=FAM76A PE=2 SV=1	9.33	35118.3
0.000101075	P21793	PGS2_BOVIN Decorin OS=Bos taurus OX=9913 GN=DCN PE=1 SV=2	8.74	36467
0.000100817	P62803	H4_BOVIN Histone H4 OS=Bos taurus OX=9913 PE=1 SV=2	11.36	11236.1
0.000100817	Q3T149	HSPB1_BOVIN Heat shock protein beta-1 OS=Bos taurus OX=9913 GN=HSPB1 PE=2 SV=1	5.98	22393.1
0.000100817	P56701	PSMD2_BOVIN 26S proteasome non-ATPase regulatory subunit 2 OS=Bos taurus OX=9913 GN=PSMD2 PE=1 SV=2	5.08	100258
0.000100817	A4FUA8	CAZA1_BOVIN F-actin-capping protein subunit alpha-1 OS=Bos taurus OX=9913 GN=CAPZA1 PE=2 SV=1	5.54	32800.6
0.000100817	Q32PI5	2AAA_BOVIN Serine/threonine-protein phosphatase 2A 65 kDa regulatory subunit A alpha isoform OS=Bos taurus OX=9913 GN=PPP2R1A PE=1 SV=1	5.03	65159.4
0.000100817	Q32PE2	MOG1_BOVIN Ran guanine nucleotide release factor OS=Bos taurus OX=9913 GN=RANGRF PE=2 SV=1	4.63	20680.3
0.000100817	P00515	KAP2_BOVIN cAMP-dependent protein kinase type II-alpha regulatory subunit OS=Bos taurus OX=9913 GN=PRKAR2A PE=1 SV=2	4.8	44962.7
0.000100817	Q2KJB1	SEP10_BOVIN Septin-10 OS=Bos taurus OX=9913 GN=SEPTIN10 PE=2 SV=1	6.67	52809.1
0.000100817	Q2NL29	INO1_BOVIN Inositol-3-phosphate synthase 1 OS=Bos taurus OX=9913 GN=ISYNA1 PE=2 SV=1	5.68	60761.4
0.000100817	Q2T9M9	JHY_BOVIN Jhy protein homolog OS=Bos taurus OX=9913 GN=JHY PE=2 SV=1	9.24	87993
0.000100817	Q9GLX9	SPON1_BOVIN Spondin-1 OS=Bos taurus OX=9913 GN=SPON1 PE=1 SV=1	5.59	88097.7
9.66318e-05	A8E639	F168B_BOVIN Myelin-associated neurite-outgrowth inhibitor OS=Bos taurus OX=9913 GN=FAM168B PE=2 SV=2	9.26	20283.9
9.66318e-05	Q3ZC24	MARH5_BOVIN E3 ubiquitin-protein ligase MARCHF5 OS=Bos taurus OX=9913 GN=MARCHF5 PE=2 SV=1	9	31231.7
9.24471e-05	A4IFA3	GT2D2_BOVIN General transcription factor II-I repeat domain-containing protein 2 OS=Bos taurus OX=9913 GN=GTF2IRD2 PE=2 SV=1	5.47	107016
9.24471e-05	Q9BE40	MYH1_BOVIN Myosin-1 OS=Bos taurus OX=9913 GN=MYH1 PE=2 SV=2	5.57	222990
9.24471e-05	Q2TBX6	PSB1_BOVIN Proteasome subunit beta type-1 OS=Bos taurus OX=9913 GN=PSMB1 PE=1 SV=1	8.61	23418.8
9.24471e-05	A6H7G2	DBNL_BOVIN Drebrin-like protein OS=Bos taurus OX=9913 GN=DBNL PE=2 SV=1	4.95	47722.8
9.24471e-05	Q2KJH6	SERPH_BOVIN Serpin H1 OS=Bos taurus OX=9913 GN=SERPINH1 PE=2 SV=1	8.82	44582.1
9.24471e-05	H2AM11	L_SBVBH RNA-directed RNA polymerase L OS=Bovine Schmallenberg virus (isolate Bovine/BH80/Germany/2011) OX=1318464 GN=L PE=3 SV=1	6.66	261027
9.24471e-05	Q28161	PKP1_BOVIN Plakophilin-1 OS=Bos taurus OX=9913 GN=PKP1 PE=2 SV=1	9.18	80180.3
9.24471e-05	O62829	PPM1A_BOVIN Protein phosphatase 1A OS=Bos taurus OX=9913 GN=PPM1A PE=2 SV=1	5.1	42398.6
9.24471e-05	Q28034	GLU2B_BOVIN Glucosidase 2 subunit beta OS=Bos taurus OX=9913 GN=PRKCSH PE=2 SV=1	4.36	58639.2
9.24471e-05	Q3ZCJ7	TBA1C_BOVIN Tubulin alpha-1C chain OS=Bos taurus OX=9913 GN=TUBA1C PE=1 SV=1	4.96	49857.3
9.24471e-05	Q0VCX5	ERF1_BOVIN Eukaryotic peptide chain release factor subunit 1 OS=Bos taurus OX=9913 GN=ETF1 PE=2 SV=3	5.51	48899.7
9.24471e-05	Q3ZBA8	NDRG2_BOVIN Protein NDRG2 OS=Bos taurus OX=9913 GN=NDRG2 PE=2 SV=1	5.49	39077.3
9.24471e-05	Q5PXY7	RABP2_BOVIN Cellular retinoic acid-binding protein 2 OS=Bos taurus OX=9913 GN=CRABP2 PE=2 SV=3	5.37	15735
9.24471e-05	A1A4R8	CDC23_BOVIN Cell division cycle protein 23 homolog OS=Bos taurus OX=9913 GN=CDC23 PE=2 SV=1	6.79	68648.8
9.24471e-05	A4FUI2	RUXE_BOVIN Small nuclear ribonucleoprotein E OS=Bos taurus OX=9913 GN=SNRPE PE=3 SV=1	9.46	10803.6
9.24471e-05	Q1RMX3	B2CL2_BOVIN Bcl-2-like protein 2 OS=Bos taurus OX=9913 GN=BCL2L2 PE=1 SV=1	5.41	20643.2
9.24471e-05	Q29RU3	CCD54_BOVIN Coiled-coil domain-containing protein 54 OS=Bos taurus OX=9913 GN=CCDC54 PE=2 SV=1	6.99	37632.2
9.24471e-05	Q2YUN8	RECF_STAAB DNA replication and repair protein RecF OS=Staphylococcus aureus (strain bovine RF122 / ET3-1) OX=273036 GN=recF PE=3 SV=1	6.03	42441.5
9.24471e-05	Q3T183	PR15L_BOVIN Proline-rich protein 15-like protein OS=Bos taurus OX=9913 GN=PRR15L PE=3 SV=1	9.84	11377.9
9.24471e-05	Q58CZ2	PCMD2_BOVIN Protein-L-isoaspartate O-methyltransferase domain-containing protein 2 OS=Bos taurus OX=9913 GN=PCMTD2 PE=2 SV=1	5.72	40655.2

## Sheet: Table S4_liposome-ave-50 (2)
Table S4: Identified proteins in liposomes in high serum (50% fetal bovine serum)
Normalized spectra count	Accession number	Protein name	PI	MW (Da)
0.0948127	Q7SIH1	A2MG_BOVIN Alpha-2-macroglobulin OS=Bos taurus OX=9913 GN=A2M PE=1 SV=2	5.68	165053
0.0910718	P02769	ALBU_BOVIN Albumin OS=Bos taurus OX=9913 GN=ALB PE=1 SV=4	5.6	66433
0.0792904	P12763	FETUA_BOVIN Alpha-2-HS-glycoprotein OS=Bos taurus OX=9913 GN=AHSG PE=1 SV=2	5.1	36353.2
0.0717176	P56652	ITIH3_BOVIN Inter-alpha-trypsin inhibitor heavy chain H3 OS=Bos taurus OX=9913 GN=ITIH3 PE=1 SV=2	5.17	68958
0.0637387	Q2UVX4	CO3_BOVIN Complement C3 OS=Bos taurus OX=9913 GN=C3 PE=1 SV=2	6.37	185047
0.0364076	P34955	A1AT_BOVIN Alpha-1-antiproteinase OS=Bos taurus OX=9913 GN=SERPINA1 PE=1 SV=1	5.98	43693.9
0.0314117	Q0VCM5	ITIH1_BOVIN Inter-alpha-trypsin inhibitor heavy chain H1 OS=Bos taurus OX=9913 GN=ITIH1 PE=1 SV=1	7.52	71584.1
0.0157775	P15497	APOA1_BOVIN Apolipoprotein A-I OS=Bos taurus OX=9913 GN=APOA1 PE=1 SV=3	5.36	27549.1
0.0151084	P01267	THYG_BOVIN Thyroglobulin OS=Bos taurus OX=9913 GN=TG PE=1 SV=1	5.5	301219
0.0149412	P00735	THRB_BOVIN Prothrombin OS=Bos taurus OX=9913 GN=F2 PE=1 SV=2	5.4	65758.9
0.0144883	P17697	CLUS_BOVIN Clusterin OS=Bos taurus OX=9913 GN=CLU PE=1 SV=1	5.72	48969.2
0.0127489	P02081	HBBF_BOVIN Hemoglobin fetal subunit beta OS=Bos taurus OX=9913 PE=1 SV=1	6.51	15859.2
0.0122937	Q29443	TRFE_BOVIN Serotransferrin OS=Bos taurus OX=9913 GN=TF PE=2 SV=1	6.5	75829.7
0.0117847	Q95121	PEDF_BOVIN Pigment epithelium-derived factor OS=Bos taurus OX=9913 GN=SERPINF1 PE=1 SV=1	6.31	44056.3
0.0116902	Q3T052	ITIH4_BOVIN Inter-alpha-trypsin inhibitor heavy chain H4 OS=Bos taurus OX=9913 GN=ITIH4 PE=1 SV=1	5.99	98686.5
0.0115084	Q28107	FA5_BOVIN Coagulation factor V OS=Bos taurus OX=9913 GN=F5 PE=1 SV=1	5.55	246062
0.0113296	P00978	AMBP_BOVIN Protein AMBP OS=Bos taurus OX=9913 GN=AMBP PE=1 SV=2	7.69	20801.8
0.0110213	Q3MHN2	CO9_BOVIN Complement component C9 OS=Bos taurus OX=9913 GN=C9 PE=2 SV=1	5.57	59705.6
0.0106807	P81644	APOA2_BOVIN Apolipoprotein A-II OS=Bos taurus OX=9913 GN=APOA2 PE=1 SV=2	5.34	8722.76
0.0101726	Q05443	LUM_BOVIN Lumican OS=Bos taurus OX=9913 GN=LUM PE=1 SV=1	5.93	37001.3
0.0091952	Q3SX14	GELS_BOVIN Gelsolin OS=Bos taurus OX=9913 GN=GSN PE=2 SV=1	5.54	80730.7
0.0085815	Q03247	APOE_BOVIN Apolipoprotein E OS=Bos taurus OX=9913 GN=APOE PE=1 SV=1	5.44	34126.5
0.00848751	P01966	HBA_BOVIN Hemoglobin subunit alpha OS=Bos taurus OX=9913 GN=HBA PE=1 SV=2	8.19	15053.2
0.00808094	Q3SZR3	A1AG_BOVIN Alpha-1-acid glycoprotein OS=Bos taurus OX=9913 GN=ORM1 PE=2 SV=1	5.67	21253
0.00795743	P07224	PROS_BOVIN Vitamin K-dependent protein S OS=Bos taurus OX=9913 GN=PROS1 PE=1 SV=1	5.01	70564.1
0.0076419	Q2KJF1	A1BG_BOVIN Alpha-1B-glycoprotein OS=Bos taurus OX=9913 GN=A1BG PE=1 SV=1	5.37	51284.8
0.00745638	Q17QW1	BORG5_BOVIN Cdc42 effector protein 1 OS=Bos taurus OX=9913 GN=CDC42EP1 PE=2 SV=1	7.86	37333.6
0.0070953	P28800	A2AP_BOVIN Alpha-2-antiplasmin OS=Bos taurus OX=9913 GN=SERPINF2 PE=1 SV=2	5.71	50431.7
0.00687942	P02672	FIBA_BOVIN Fibrinogen alpha chain OS=Bos taurus OX=9913 GN=FGA PE=1 SV=5	3.77	1891.92
0.00661985	Q3SZ57	FETA_BOVIN Alpha-fetoprotein OS=Bos taurus OX=9913 GN=AFP PE=2 SV=1	5.92	66412
0.00633853	Q58D62	FETUB_BOVIN Fetuin-B OS=Bos taurus OX=9913 GN=FETUB PE=1 SV=1	5.59	40845.9
0.00579474	Q76LV2	HS90A_BOVIN Heat shock protein HSP 90-alpha OS=Bos taurus OX=9913 GN=HSP90AA1 PE=1 SV=3	4.92	84730.8
0.00576845	Q28085	CFAH_BOVIN Complement factor H OS=Bos taurus OX=9913 GN=CFH PE=1 SV=3	6.33	138259
0.00547839	P00743	FA10_BOVIN Coagulation factor X OS=Bos taurus OX=9913 GN=F10 PE=1 SV=1	5.04	50166.9
0.00542948	P50448	F12AI_BOVIN Factor XIIa inhibitor OS=Bos taurus OX=9913 PE=1 SV=1	6.08	49273.3
0.00535742	P13605	FMOD_BOVIN Fibromodulin OS=Bos taurus OX=9913 GN=FMOD PE=1 SV=2	5.57	41092.3
0.00523219	Q76LV1	HS90B_BOVIN Heat shock protein HSP 90-beta OS=Bos taurus OX=9913 GN=HSP90AB1 PE=2 SV=3	4.96	83253.2
0.004659	G3MYZ3	AFAM_BOVIN Afamin OS=Bos taurus OX=9913 GN=AFM PE=1 SV=1	5.57	67068.8
0.00444982	P81948	TBA4A_BOVIN Tubulin alpha-4A chain OS=Bos taurus OX=9913 GN=TUBA4A PE=1 SV=2	4.93	49924.4
0.00422991	P41361	ANT3_BOVIN Antithrombin-III OS=Bos taurus OX=9913 GN=SERPINC1 PE=1 SV=2	6.41	49061.1
0.00419479	A7E3W2	LG3BP_BOVIN Galectin-3-binding protein OS=Bos taurus OX=9913 GN=LGALS3BP PE=1 SV=1	5.25	60016.2
0.00416413	Q9N2I2	IPSP_BOVIN Plasma serine protease inhibitor OS=Bos taurus OX=9913 GN=SERPINA5 PE=1 SV=1	9.12	42495.2
0.00414904	P06868	PLMN_BOVIN Plasminogen OS=Bos taurus OX=9913 GN=PLG PE=1 SV=2	7.39	88393.5
0.00414109	P62261	1433E_BOVIN 14-3-3 protein epsilon OS=Bos taurus OX=9913 GN=YWHAE PE=2 SV=1	4.63	29173.9
0.00406895	P80227	ACPH_BOVIN Acylamino-acid-releasing enzyme OS=Bos taurus OX=9913 GN=APEH PE=1 SV=2	5.18	81093.4
0.00405705	P31836	NCAM1_BOVIN Neural cell adhesion molecule 1 OS=Bos taurus OX=9913 GN=NCAM1 PE=1 SV=1	4.85	91727.9
0.0039151	Q3Y5Z3	ADIPO_BOVIN Adiponectin OS=Bos taurus OX=9913 GN=ADIPOQ PE=1 SV=1	5.33	24391
0.00389985	Q32KY0	APOD_BOVIN Apolipoprotein D OS=Bos taurus OX=9913 GN=APOD PE=2 SV=1	4.86	19467.2
0.00374165	Q32PJ2	APOA4_BOVIN Apolipoprotein A-IV OS=Bos taurus OX=9913 GN=APOA4 PE=2 SV=1	5.29	41032.3
0.0037173	Q5E9Z2	HABP2_BOVIN Hyaluronan-binding protein 2 OS=Bos taurus OX=9913 GN=HABP2 PE=2 SV=1	5.94	32715.4
0.00363447	P01017	ANGT_BOVIN Angiotensinogen OS=Bos taurus OX=9913 GN=AGT PE=1 SV=2	6.49	49230.5
0.00337235	P10096	G3P_BOVIN Glyceraldehyde-3-phosphate dehydrogenase OS=Bos taurus OX=9913 GN=GAPDH PE=1 SV=4	8.52	35736.9
0.00321573	Q8SPJ1	PLAK_BOVIN Junction plakoglobin OS=Bos taurus OX=9913 GN=JUP PE=2 SV=1	5.75	81820.8
0.00321188	O46375	TTHY_BOVIN Transthyretin OS=Bos taurus OX=9913 GN=TTR PE=1 SV=1	5.91	13557.3
0.0032058	Q2KJD0	TBB5_BOVIN Tubulin beta-5 chain OS=Bos taurus OX=9913 GN=TUBB5 PE=2 SV=1	4.78	49670.8
0.00316478	Q58CQ9	VNN1_BOVIN Pantetheinase OS=Bos taurus OX=9913 GN=VNN1 PE=1 SV=1	5.07	52431.3
0.00309041	Q2KIV9	C1QB_BOVIN Complement C1q subcomponent subunit B OS=Bos taurus OX=9913 GN=C1QB PE=1 SV=1	9.26	23937.1
0.0030893	Q3MHL4	SAHH_BOVIN Adenosylhomocysteinase OS=Bos taurus OX=9913 GN=AHCY PE=2 SV=3	5.88	47506.8
0.0030564	Q0VCX1	C1S_BOVIN Complement C1s subcomponent OS=Bos taurus OX=9913 GN=C1S PE=2 SV=2	4.97	74826
0.00305537	Q9TTJ5	RGN_BOVIN Regucalcin OS=Bos taurus OX=9913 GN=RGN PE=2 SV=1	5.54	33307.8
0.00303662	P00745	PROC_BOVIN Vitamin K-dependent protein C (Fragment) OS=Bos taurus OX=9913 GN=PROC PE=1 SV=1	5.39	47062.4
0.0030153	P01045	KNG2_BOVIN Kininogen-2 OS=Bos taurus OX=9913 GN=KNG2 PE=1 SV=1	6	66665.4
0.00299499	Q9TT36	THBG_BOVIN Thyroxine-binding globulin OS=Bos taurus OX=9913 GN=SERPINA7 PE=2 SV=1	5.4	44366.1
0.00297125	Q3SZP2	MARE2_BOVIN Microtubule-associated protein RP/EB family member 2 OS=Bos taurus OX=9913 GN=MAPRE2 PE=2 SV=1	5.36	36988.3
0.00276026	Q0VCG9	PTX3_BOVIN Pentraxin-related protein PTX3 OS=Bos taurus OX=9913 GN=PTX3 PE=2 SV=1	5.02	40190.5
0.00275093	Q32LP0	URP2_BOVIN Fermitin family homolog 3 OS=Bos taurus OX=9913 GN=FERMT3 PE=2 SV=1	6.2	75782.6
0.00274322	P02676	FIBB_BOVIN Fibrinogen beta chain OS=Bos taurus OX=9913 GN=FGB PE=1 SV=2	4.36	2364.51
0.0027081	P12799	FIBG_BOVIN Fibrinogen gamma-B chain OS=Bos taurus OX=9913 GN=FGG PE=1 SV=1	5.46	47652
0.00265858	P12260	F13A_BOVIN Coagulation factor XIII A chain (Fragment) OS=Bos taurus OX=9913 GN=F13A1 PE=1 SV=2	n/a	n/a
0.00256855	Q3MHN5	VTDB_BOVIN Vitamin D-binding protein OS=Bos taurus OX=9913 GN=GC PE=2 SV=1	5.19	51531.7
0.002539	P13608	PGCA_BOVIN Aggrecan core protein OS=Bos taurus OX=9913 GN=ACAN PE=1 SV=3	4.15	244589
0.00251972	Q27967	SPP24_BOVIN Secreted phosphoprotein 24 OS=Bos taurus OX=9913 GN=SPP2 PE=1 SV=2	7.85	20479.8
0.00249129	E1BF81	CBG_BOVIN Corticosteroid-binding globulin OS=Bos taurus OX=9913 GN=SERPINA6 PE=3 SV=1	5.54	42622.5
0.00222349	P00741	FA9_BOVIN Coagulation factor IX OS=Bos taurus OX=9913 GN=F9 PE=1 SV=2	5.72	49291.3
0.00218949	Q95M18	ENPL_BOVIN Endoplasmin OS=Bos taurus OX=9913 GN=HSP90B1 PE=2 SV=1	4.73	90135.8
0.00214494	Q9TTE1	SPA31_BOVIN Serpin A3-1 OS=Bos taurus OX=9913 GN=SERPINA3-1 PE=1 SV=3	5.41	43640.8
0.00211239	P01044	KNG1_BOVIN Kininogen-1 OS=Bos taurus OX=9913 GN=KNG1 PE=1 SV=1	6.05	66845.5
0.00208952	O77742	OMD_BOVIN Osteomodulin OS=Bos taurus OX=9913 GN=OMD PE=1 SV=1	5.2	45889.6
0.00206648	P63103	1433Z_BOVIN 14-3-3 protein zeta/delta OS=Bos taurus OX=9913 GN=YWHAZ PE=1 SV=1	4.73	27745.1
0.00204174	A5D7D1	ACTN4_BOVIN Alpha-actinin-4 OS=Bos taurus OX=9913 GN=ACTN4 PE=2 SV=1	5.27	104928
0.00198612	Q27991	MYH10_BOVIN Myosin-10 OS=Bos taurus OX=9913 GN=MYH10 PE=2 SV=2	5.43	229099
0.00197524	Q29RQ1	CO7_BOVIN Complement component C7 OS=Bos taurus OX=9913 GN=C7 PE=2 SV=1	6.9	90602.2
0.00190645	Q2TBU0	HPT_BOVIN Haptoglobin OS=Bos taurus OX=9913 GN=HP PE=2 SV=1	7.89	43032.9
0.00188778	Q3SZV7	HEMO_BOVIN Hemopexin OS=Bos taurus OX=9913 GN=HPX PE=2 SV=1	7.1	49688.1
0.0018142	Q2YDE4	PSA6_BOVIN Proteasome subunit alpha type-6 OS=Bos taurus OX=9913 GN=PSMA6 PE=1 SV=1	6.34	27399.5
0.00180161	Q2KJH4	WDR1_BOVIN WD repeat-containing protein 1 OS=Bos taurus OX=9913 GN=WDR1 PE=2 SV=3	6.24	66257.6
0.00179715	Q3B7N2	ACTN1_BOVIN Alpha-actinin-1 OS=Bos taurus OX=9913 GN=ACTN1 PE=2 SV=1	5.25	102980
0.00177411	P55906	BGH3_BOVIN Transforming growth factor-beta-induced protein ig-h3 OS=Bos taurus OX=9913 GN=TGFBI PE=1 SV=2	6.69	72210.8
0.00174558	P35445	COMP_BOVIN Cartilage oligomeric matrix protein OS=Bos taurus OX=9913 GN=COMP PE=1 SV=2	4.36	80469
0.00174497	Q3ZBG0	PSA7_BOVIN Proteasome subunit alpha type-7 OS=Bos taurus OX=9913 GN=PSMA7 PE=1 SV=1	8.59	27868.9
0.00169667	Q0VCX2	BIP_BOVIN Endoplasmic reticulum chaperone BiP OS=Bos taurus OX=9913 GN=HSPA5 PE=2 SV=1	5.01	70464.6
0.00163832	Q28065	C4BPA_BOVIN C4b-binding protein alpha chain OS=Bos taurus OX=9913 GN=C4BPA PE=2 SV=1	5.66	63526
0.00160158	Q29RU4	CO6_BOVIN Complement component C6 OS=Bos taurus OX=9913 GN=C6 PE=2 SV=1	6.59	102164
0.00150872	P19035	APOC3_BOVIN Apolipoprotein C-III OS=Bos taurus OX=9913 GN=APOC3 PE=1 SV=2	4.73	8217.01
0.00149227	A6H768	GALK1_BOVIN Galactokinase OS=Bos taurus OX=9913 GN=GALK1 PE=2 SV=2	5.77	42227
0.00143403	P00744	PROZ_BOVIN Vitamin K-dependent protein Z OS=Bos taurus OX=9913 GN=PROZ PE=1 SV=1	6.09	43112.7
0.00143016	P81282	CSPG2_BOVIN Versican core protein OS=Bos taurus OX=9913 GN=VCAN PE=1 SV=2	4.46	367778
0.00141594	P49951	CLH1_BOVIN Clathrin heavy chain 1 OS=Bos taurus OX=9913 GN=CLTC PE=1 SV=1	5.48	191457
0.00141251	Q03763	DSG1_BOVIN Desmoglein-1 OS=Bos taurus OX=9913 GN=DSG1 PE=1 SV=1	4.79	106250
0.00139058	P80109	PHLD_BOVIN Phosphatidylinositol-glycan-specific phospholipase D OS=Bos taurus OX=9913 GN=GPLD1 PE=1 SV=1	6.06	90002.6
0.00134826	Q3SWW8	TSP4_BOVIN Thrombospondin-4 OS=Bos taurus OX=9913 GN=THBS4 PE=2 SV=1	4.41	103545
0.00133405	Q58DU5	PSA3_BOVIN Proteasome subunit alpha type-3 OS=Bos taurus OX=9913 GN=PSMA3 PE=1 SV=3	5.19	28274
0.00133122	Q9BGI3	PRDX2_BOVIN Peroxiredoxin-2 OS=Bos taurus OX=9913 GN=PRDX2 PE=2 SV=1	5.37	21946
0.00130381	P13213	SPRC_BOVIN SPARC OS=Bos taurus OX=9913 GN=SPARC PE=1 SV=2	4.64	32678.7
0.00130381	P68252	1433G_BOVIN 14-3-3 protein gamma OS=Bos taurus OX=9913 GN=YWHAG PE=1 SV=2	4.8	28252.6
0.00130055	Q95122	CD14_BOVIN Monocyte differentiation antigen CD14 OS=Bos taurus OX=9913 GN=CD14 PE=2 SV=2	5.24	37470.9
0.00128727	O46415	FRIL_BOVIN Ferritin light chain OS=Bos taurus OX=9913 GN=FTL PE=2 SV=3	5.88	19856.5
0.00127845	P19120	HSP7C_BOVIN Heat shock cognate 71 kDa protein OS=Bos taurus OX=9913 GN=HSPA8 PE=1 SV=2	5.37	71109.3
0.00124444	Q3T0X5	PSA1_BOVIN Proteasome subunit alpha type-1 OS=Bos taurus OX=9913 GN=PSMA1 PE=1 SV=1	6.15	29585.6
0.00120324	Q5E9E2	MYL9_BOVIN Myosin regulatory light polypeptide 9 OS=Bos taurus OX=9913 GN=MYL9 PE=2 SV=3	4.65	19734
0.00116589	Q2KJH9	AL9A1_BOVIN 4-trimethylaminobutyraldehyde dehydrogenase OS=Bos taurus OX=9913 GN=ALDH9A1 PE=2 SV=1	5.84	53845.9
0.00111587	P08169	MPRI_BOVIN Cation-independent mannose-6-phosphate receptor OS=Bos taurus OX=9913 GN=IGF2R PE=1 SV=2	5.57	269955
0.0010846	P68103	EF1A1_BOVIN Elongation factor 1-alpha 1 OS=Bos taurus OX=9913 GN=EEF1A1 PE=1 SV=1	9.1	50009.7
0.00108236	Q3SZ54	IF4A1_BOVIN Eukaryotic initiation factor 4A-I OS=Bos taurus OX=9913 GN=EIF4A1 PE=2 SV=1	5.32	46022.7
0.00106583	P55252	HPLN1_BOVIN Hyaluronan and proteoglycan link protein 1 OS=Bos taurus OX=9913 GN=HAPLN1 PE=2 SV=1	7.66	38568.4
0.00104441	Q2KIS7	TETN_BOVIN Tetranectin OS=Bos taurus OX=9913 GN=CLEC3B PE=2 SV=1	5.69	19824.5
0.000999956	P33433	HRG_BOVIN Histidine-rich glycoprotein (Fragments) OS=Bos taurus OX=9913 GN=HRG PE=1 SV=1	7.06	44470.6
0.00099113	Q5KR47	TPM3_BOVIN Tropomyosin alpha-3 chain OS=Bos taurus OX=9913 GN=TPM3 PE=2 SV=1	4.68	32818.8
0.000987877	Q0VCP3	OLFL3_BOVIN Olfactomedin-like protein 3 OS=Bos taurus OX=9913 GN=OLFML3 PE=2 SV=1	6.18	43603.4
0.000980168	Q3ZEJ6	SPA33_BOVIN Serpin A3-3 OS=Bos taurus OX=9913 GN=SERPINA3-3 PE=1 SV=2	5.73	43768.1
0.000980168	Q3T0Y5	PSA2_BOVIN Proteasome subunit alpha type-2 OS=Bos taurus OX=9913 GN=PSMA2 PE=1 SV=3	7.12	25767.4
0.000978542	Q3SZV3	EF1G_BOVIN Elongation factor 1-gamma OS=Bos taurus OX=9913 GN=EEF1G PE=2 SV=1	6.17	50246.9
0.0009298	O62829	PPM1A_BOVIN Protein phosphatase 1A OS=Bos taurus OX=9913 GN=PPM1A PE=2 SV=1	5.1	42398.6
0.000919785	P02070	HBB_BOVIN Hemoglobin subunit beta OS=Bos taurus OX=9913 GN=HBB PE=1 SV=1	7.02	15954.4
0.000887395	P62833	RAP1A_BOVIN Ras-related protein Rap-1A OS=Bos taurus OX=9913 GN=RAP1A PE=1 SV=1	6.39	20647.7
0.000870775	P01030	CO4_BOVIN Complement C4 (Fragments) OS=Bos taurus OX=9913 GN=C4 PE=1 SV=2	5.55	67995.4
0.000862642	Q32S24	COBA2_BOVIN Collagen alpha-2(XI) chain OS=Bos taurus OX=9913 GN=COL11A2 PE=3 SV=1	5.96	169140
0.000852189	Q17QH6	COL11_BOVIN Collectin-11 OS=Bos taurus OX=9913 GN=COLEC11 PE=2 SV=1	5.16	26174.4
0.000849445	Q29423	CD44_BOVIN CD44 antigen OS=Bos taurus OX=9913 GN=CD44 PE=2 SV=1	6.44	37651.9
0.000823575	Q3T054	RAN_BOVIN GTP-binding nuclear protein Ran OS=Bos taurus OX=9913 GN=RAN PE=2 SV=3	7.2	24291.9
0.000814239	P52193	CALR_BOVIN Calreticulin OS=Bos taurus OX=9913 GN=CALR PE=1 SV=2	4.31	46381.4
0.000814239	Q5E9K0	PSB2_BOVIN Proteasome subunit beta type-2 OS=Bos taurus OX=9913 GN=PSMB2 PE=1 SV=1	6.52	22896.3
0.000813122	P68509	1433F_BOVIN 14-3-3 protein eta OS=Bos taurus OX=9913 GN=YWHAH PE=1 SV=2	4.81	28080.5
0.000799416	P42916	CL43_BOVIN Collectin-43 OS=Bos taurus OX=9913 GN=CL43 PE=1 SV=2	5.04	31448.8
0.000788964	P0C0S9	H2A1_BOVIN Histone H2A type 1 OS=Bos taurus OX=9913 PE=1 SV=2	10.9	13960.3
0.000782372	A6H767	NP1L1_BOVIN Nucleosome assembly protein 1-like 1 OS=Bos taurus OX=9913 GN=NAP1L1 PE=2 SV=1	4.34	44860.5
0.000771919	A7MBJ5	CAND1_BOVIN Cullin-associated NEDD8-dissociated protein 1 OS=Bos taurus OX=9913 GN=CAND1 PE=2 SV=1	5.52	136245
0.000749903	Q5E9B1	LDHB_BOVIN L-lactate dehydrogenase B chain OS=Bos taurus OX=9913 GN=LDHB PE=2 SV=4	6.03	36592.4
0.000718637	P05307	PDIA1_BOVIN Protein disulfide-isomerase OS=Bos taurus OX=9913 GN=P4HB PE=1 SV=1	4.73	55166
0.000717781	Q32KL2	PSB5_BOVIN Proteasome subunit beta type-5 OS=Bos taurus OX=9913 GN=PSMB5 PE=1 SV=1	8.33	22474.3
0.000717781	P21809	PGS1_BOVIN Biglycan OS=Bos taurus OX=9913 GN=BGN PE=1 SV=3	8.13	37347.1
0.000698849	Q1RMS2	PYRG2_BOVIN CTP synthase 2 OS=Bos taurus OX=9913 GN=CTPS2 PE=2 SV=1	6.06	65481.2
0.000673064	P22457	FA7_BOVIN Coagulation factor VII OS=Bos taurus OX=9913 GN=F7 PE=1 SV=2	4.54	16871.5
0.000662611	A3KMV5	UBA1_BOVIN Ubiquitin-like modifier-activating enzyme 1 OS=Bos taurus OX=9913 GN=UBA1 PE=2 SV=1	5.5	117699
0.000662611	Q5E947	PRDX1_BOVIN Peroxiredoxin-1 OS=Bos taurus OX=9913 GN=PRDX1 PE=2 SV=1	8.59	22078.3
0.000657646	P80012	VWF_BOVIN von Willebrand factor (Fragment) OS=Bos taurus OX=9913 GN=VWF PE=1 SV=2	4.74	18759.7
0.000654301	Q5E9B7	CLIC1_BOVIN Chloride intracellular channel protein 1 OS=Bos taurus OX=9913 GN=CLIC1 PE=2 SV=3	5.17	26860.6
0.000653276	P81187	CFAB_BOVIN Complement factor B OS=Bos taurus OX=9913 GN=CFB PE=1 SV=2	7.68	82850.1
0.000638622	O62698	PGH2_BOVIN Prostaglandin G/H synthase 2 OS=Bos taurus OX=9913 GN=PTGS2 PE=2 SV=2	7.13	67537.4
0.000633997	P60661	MYL6_BOVIN Myosin light polypeptide 6 OS=Bos taurus OX=9913 GN=MYL6 PE=2 SV=2	4.56	16798.9
0.000619867	A4FUA8	CAZA1_BOVIN F-actin-capping protein subunit alpha-1 OS=Bos taurus OX=9913 GN=CAPZA1 PE=2 SV=1	5.54	32800.6
0.000614209	Q6H236	PEG3_BOVIN Paternally-expressed gene 3 protein OS=Bos taurus OX=9913 GN=PEG3 PE=2 SV=1	4.61	264828
0.000609329	Q9N0T5	IF4E_BOVIN Eukaryotic translation initiation factor 4E OS=Bos taurus OX=9913 GN=EIF4E PE=2 SV=2	5.8	24948
0.000600503	P04272	ANXA2_BOVIN Annexin A2 OS=Bos taurus OX=9913 GN=ANXA2 PE=1 SV=2	6.9	38480.9
0.000594421	P21793	PGS2_BOVIN Decorin OS=Bos taurus OX=9913 GN=DCN PE=1 SV=2	8.74	36467
0.000592794	P33672	PSB3_BOVIN Proteasome subunit beta type-3 OS=Bos taurus OX=9913 GN=PSMB3 PE=1 SV=3	6.13	22861.7
0.000586288	P68250	1433B_BOVIN 14-3-3 protein beta/alpha OS=Bos taurus OX=9913 GN=YWHAB PE=1 SV=2	4.8	28081.4
0.00058517	A7YWP4	HUTH_BOVIN Histidine ammonia-lyase OS=Bos taurus OX=9913 GN=HAL PE=2 SV=1	6.24	72291
0.000573614	Q2TBI0	LBP_BOVIN Lipopolysaccharide-binding protein OS=Bos taurus OX=9913 GN=LBP PE=2 SV=1	6.65	51264.2
0.000573614	Q5E9R3	EHD1_BOVIN EH domain-containing protein 1 OS=Bos taurus OX=9913 GN=EHD1 PE=1 SV=1	6.35	60681.9
0.000560502	P07106	ACBD5_BOVIN Acyl-CoA-binding domain-containing protein 5 OS=Bos taurus OX=9913 GN=ACBD5 PE=2 SV=2	5.44	59652.6
0.000556556	P62992	RS27A_BOVIN Ubiquitin-40S ribosomal protein S27a OS=Bos taurus OX=9913 GN=RPS27A PE=1 SV=2	6.56	8564.84
0.000537885	Q6B856	TBB2B_BOVIN Tubulin beta-2B chain OS=Bos taurus OX=9913 GN=TUBB2B PE=1 SV=2	4.78	49953.1
0.000535141	Q0P5A6	PSMD5_BOVIN 26S proteasome non-ATPase regulatory subunit 5 OS=Bos taurus OX=9913 GN=PSMD5 PE=2 SV=1	5.18	55911.3
0.000531888	Q3SZ79	LIPC_BOVIN Hepatic triacylglycerol lipase OS=Bos taurus OX=9913 GN=LIPC PE=2 SV=1	9.23	54452.4
0.000526923	Q3SWY2	ILK_BOVIN Integrin-linked protein kinase OS=Bos taurus OX=9913 GN=ILK PE=2 SV=1	8.3	51447.3
0.000526577	Q0V8C2	EXOC3_BOVIN Exocyst complex component 3 OS=Bos taurus OX=9913 GN=EXOC3 PE=2 SV=1	5.83	85581.3
0.000518097	Q5EA61	KCRB_BOVIN Creatine kinase B-type OS=Bos taurus OX=9913 GN=CKB PE=1 SV=1	5.47	42719.4
0.000510134	P24591	IBP1_BOVIN Insulin-like growth factor-binding protein 1 OS=Bos taurus OX=9913 GN=IGFBP1 PE=2 SV=2	6.38	26206.9
0.000507135	Q3SYU2	EF2_BOVIN Elongation factor 2 OS=Bos taurus OX=9913 GN=EEF2 PE=2 SV=3	6.41	95368.2
0.000494455	Q3T108	PSB4_BOVIN Proteasome subunit beta type-4 OS=Bos taurus OX=9913 GN=PSMB4 PE=1 SV=1	5.45	24361.8
0.000490685	A3KN12	PUR8_BOVIN Adenylosuccinate lyase OS=Bos taurus OX=9913 GN=ADSL PE=2 SV=1	6.47	55352.7
0.000483486	P02662	CASA1_BOVIN Alpha-S1-casein OS=Bos taurus OX=9913 GN=CSN1S1 PE=1 SV=2	4.91	22974.9
0.000478776	P18902	RET4_BOVIN Retinol-binding protein 4 OS=Bos taurus OX=9913 GN=RBP4 PE=1 SV=1	5.44	21068.6
0.000478011	A1A4I4	PKN1_BOVIN Serine/threonine-protein kinase N1 OS=Bos taurus OX=9913 GN=PKN1 PE=2 SV=1	6.09	104002
0.000478011	P62871	GBB1_BOVIN Guanine nucleotide-binding protein G(I)/G(S)/G(T) subunit beta-1 OS=Bos taurus OX=9913 GN=GNB1 PE=1 SV=3	5.6	37245.8
0.000476894	Q0P569	NUCB1_BOVIN Nucleobindin-1 OS=Bos taurus OX=9913 GN=NUCB1 PE=1 SV=1	5.05	52483.3
0.000475777	Q1RMU7	SESQ2_BOVIN Sesquipedalian-2 OS=Bos taurus OX=9913 GN=PHETA2 PE=2 SV=1	7.05	28626.3
0.00047222	Q0P5F9	AL8A1_BOVIN 2-aminomuconic semialdehyde dehydrogenase OS=Bos taurus OX=9913 GN=ALDH8A1 PE=2 SV=1	7.52	53362.6
0.000471456	Q5E9F7	COF1_BOVIN Cofilin-1 OS=Bos taurus OX=9913 GN=CFL1 PE=2 SV=3	8.21	18387.4
0.000471456	Q32PI5	2AAA_BOVIN Serine/threonine-protein phosphatase 2A 65 kDa regulatory subunit A alpha isoform OS=Bos taurus OX=9913 GN=PPP2R1A PE=1 SV=1	5.03	65159.4
0.00046734	Q3MHM5	TBB4B_BOVIN Tubulin beta-4B chain OS=Bos taurus OX=9913 GN=TUBB4B PE=1 SV=1	4.79	49831
0.0004649	Q08DK9	PWP3A_BOVIN PWWP domain-containing DNA repair factor 3A OS=Bos taurus OX=9913 GN=PWWP3A PE=2 SV=1	8.82	71108.6
0.000455479	Q5E9F9	PRS7_BOVIN 26S proteasome regulatory subunit 7 OS=Bos taurus OX=9913 GN=PSMC2 PE=2 SV=3	5.71	48633.8
0.000454362	A4IFA3	GT2D2_BOVIN General transcription factor II-I repeat domain-containing protein 2 OS=Bos taurus OX=9913 GN=GTF2IRD2 PE=2 SV=1	5.47	107016
0.000447418	P17690	APOH_BOVIN Beta-2-glycoprotein 1 OS=Bos taurus OX=9913 GN=APOH PE=1 SV=4	8.55	36294.6
0.000442283	P62808	H2B1_BOVIN Histone H2B type 1 OS=Bos taurus OX=9913 PE=1 SV=2	10.32	13775
0.000442283	P98140	FA12_BOVIN Coagulation factor XII OS=Bos taurus OX=9913 GN=F12 PE=1 SV=2	5.05	26185.5
0.000435218	P22226	CTHL1_BOVIN Cathelicidin-1 OS=Bos taurus OX=9913 GN=CATHL1 PE=1 SV=2	11.53	1485.92
0.000431321	A6QQ07	BTD_BOVIN Biotinidase OS=Bos taurus OX=9913 GN=BTD PE=2 SV=1	5.74	55796.4
0.000430204	Q29RU2	OIT3_BOVIN Oncoprotein-induced transcript 3 protein OS=Bos taurus OX=9913 GN=OIT3 PE=2 SV=1	5.25	58489.9
0.000414531	P56701	PSMD2_BOVIN 26S proteasome non-ATPase regulatory subunit 2 OS=Bos taurus OX=9913 GN=PSMD2 PE=1 SV=2	5.08	100258
0.000411533	Q71SP7	FAS_BOVIN Fatty acid synthase OS=Bos taurus OX=9913 GN=FASN PE=1 SV=1	6.23	274554
0.000408789	Q3ZCK9	PSA4_BOVIN Proteasome subunit alpha type-4 OS=Bos taurus OX=9913 GN=PSMA4 PE=1 SV=1	7.58	29483.8
0.000398336	G3X745	GPC1_BOVIN Glypican-1 OS=Bos taurus OX=9913 GN=GPC1 PE=2 SV=1	5.71	55663
0.000390627	Q0VD19	ASM_BOVIN Sphingomyelin phosphodiesterase OS=Bos taurus OX=9913 GN=SMPD1 PE=2 SV=1	5.87	65185.4
0.000389001	P69678	CUTA_BOVIN Protein CutA OS=Bos taurus OX=9913 GN=CUTA PE=1 SV=1	5.87	15766.2
0.000382409	P02453	CO1A1_BOVIN Collagen alpha-1(I) chain OS=Bos taurus OX=9913 GN=COL1A1 PE=1 SV=3	9.28	94673
0.000382409	P37141	GPX3_BOVIN Glutathione peroxidase 3 OS=Bos taurus OX=9913 GN=GPX3 PE=2 SV=2	6	23119.3
0.000382409	Q3ZCJ7	TBA1C_BOVIN Tubulin alpha-1C chain OS=Bos taurus OX=9913 GN=TUBA1C PE=1 SV=1	4.96	49857.3
0.000382409	Q2KJ83	CBPN_BOVIN Carboxypeptidase N catalytic chain OS=Bos taurus OX=9913 GN=CPN1 PE=2 SV=1	8.76	50530.1
0.000379665	P81287	ANXA5_BOVIN Annexin A5 OS=Bos taurus OX=9913 GN=ANXA5 PE=1 SV=3	4.85	35957.7
0.000379665	Q2KIT0	HP20_BOVIN Protein HP-20 homolog OS=Bos taurus OX=9913 PE=2 SV=1	8.86	18889.8
0.000376921	Q5KR49	TPM1_BOVIN Tropomyosin alpha-1 chain OS=Bos taurus OX=9913 GN=TPM1 PE=2 SV=1	4.69	32694.6
0.000375853	P00432	CATA_BOVIN Catalase OS=Bos taurus OX=9913 GN=CAT PE=1 SV=3	6.82	59784.1
0.000369213	P53712	ITB1_BOVIN Integrin beta-1 OS=Bos taurus OX=9913 GN=ITGB1 PE=1 SV=3	5.29	85868.2
0.00035876	Q3T149	HSPB1_BOVIN Heat shock protein beta-1 OS=Bos taurus OX=9913 GN=HSPB1 PE=2 SV=1	5.98	22393.1
0.000351051	P02459	CO2A1_BOVIN Collagen alpha-1(II) chain OS=Bos taurus OX=9913 GN=COL2A1 PE=1 SV=4	8.38	123470
0.000351051	P48616	VIME_BOVIN Vimentin OS=Bos taurus OX=9913 GN=VIM PE=1 SV=3	5.05	53596.6
0.000351051	Q2TBX6	PSB1_BOVIN Proteasome subunit beta type-1 OS=Bos taurus OX=9913 GN=PSMB1 PE=1 SV=1	8.61	23418.8
0.000346171	P62803	H4_BOVIN Histone H4 OS=Bos taurus OX=9913 PE=1 SV=2	11.36	11236.1
0.000346171	A2VE10	GOLM2_BOVIN Protein GOLM2 OS=Bos taurus OX=9913 GN=GOLM2 PE=2 SV=1	6.33	43199.4
0.000346171	Q5KR48	TPM2_BOVIN Tropomyosin beta chain OS=Bos taurus OX=9913 GN=TPM2 PE=2 SV=1	4.66	32836.7
0.000335719	Q27971	CAN2_BOVIN Calpain-2 catalytic subunit OS=Bos taurus OX=9913 GN=CAPN2 PE=2 SV=2	4.84	78081.1
0.000328519	Q3ZBH0	TCPB_BOVIN T-complex protein 1 subunit beta OS=Bos taurus OX=9913 GN=CCT2 PE=1 SV=3	6.19	57344.1
0.000328052	P19858	LDHA_BOVIN L-lactate dehydrogenase A chain OS=Bos taurus OX=9913 GN=LDHA PE=2 SV=2	8.17	36466.4
0.000325266	Q5I2E5	FCN2_BOVIN Ficolin-2 OS=Bos taurus OX=9913 GN=FCN2 PE=2 SV=1	7.75	32667.3
0.000318929	O02659	MBL2_BOVIN Mannose-binding protein C OS=Bos taurus OX=9913 GN=MBL PE=2 SV=1	5.11	24402.4
0.000318929	P50227	ST1A1_BOVIN Sulfotransferase 1A1 OS=Bos taurus OX=9913 GN=SULT1A1 PE=1 SV=2	6.52	34183.6
0.000316489	Q3T0K2	TCPG_BOVIN T-complex protein 1 subunit gamma OS=Bos taurus OX=9913 GN=CCT3 PE=1 SV=1	6.38	60585.9
0.00031593	P19034	APOC2_BOVIN Apolipoprotein C-II OS=Bos taurus OX=9913 GN=APOC2 PE=1 SV=2	5.13	7944.97
0.000309933	P27479	LOX15_BOVIN Polyunsaturated fatty acid lipoxygenase ALOX15 OS=Bos taurus OX=9913 GN=ALOX15 PE=1 SV=3	6.09	75124.4
0.000303851	Q5E9F8	H33_BOVIN Histone H3.3 OS=Bos taurus OX=9913 GN=H3-3A PE=1 SV=3	11.27	15196.7
0.000303851	Q9TU47	IF6_BOVIN Eukaryotic translation initiation factor 6 OS=Bos taurus OX=9913 GN=EIF6 PE=2 SV=2	4.61	26513
0.00030325	Q2TA40	NP1L4_BOVIN Nucleosome assembly protein 1-like 4 OS=Bos taurus OX=9913 GN=NAP1L4 PE=2 SV=1	4.55	43854.4
0.00030325	Q3SZC2	PSB9_BOVIN Proteasome subunit beta type-9 OS=Bos taurus OX=9913 GN=PSMB9 PE=1 SV=1	4.93	21373.2
0.00029837	Q92176	COR1A_BOVIN Coronin-1A OS=Bos taurus OX=9913 GN=CORO1A PE=1 SV=3	6.25	50848
0.00029837	Q2KJC6	METK1_BOVIN S-adenosylmethionine synthase isoform type-1 OS=Bos taurus OX=9913 GN=MAT1A PE=2 SV=1	5.51	43760.8
0.000287571	P27214	ANX11_BOVIN Annexin A11 OS=Bos taurus OX=9913 GN=ANXA11 PE=1 SV=1	7.53	54018.2
0.000286807	P79134	ANXA6_BOVIN Annexin A6 OS=Bos taurus OX=9913 GN=ANXA6 PE=1 SV=2	5.64	75776.2
0.000286807	P41541	USO1_BOVIN General vesicular transport factor p115 OS=Bos taurus OX=9913 GN=USO1 PE=1 SV=1	4.84	107515
0.000286807	Q95140	RLA0_BOVIN 60S acidic ribosomal protein P0 OS=Bos taurus OX=9913 GN=RPLP0 PE=2 SV=3	5.7	34370.6
0.000286807	P00515	KAP2_BOVIN cAMP-dependent protein kinase type II-alpha regulatory subunit OS=Bos taurus OX=9913 GN=PRKAR2A PE=1 SV=2	4.8	44962.7
0.000286807	Q0VCX5	ERF1_BOVIN Eukaryotic peptide chain release factor subunit 1 OS=Bos taurus OX=9913 GN=ETF1 PE=2 SV=3	5.51	48899.7
0.000286807	Q27954	COPA_BOVIN Coatomer subunit alpha OS=Bos taurus OX=9913 GN=COPA PE=1 SV=1	7.7	138359
0.000286807	Q2KJ46	PSMD3_BOVIN 26S proteasome non-ATPase regulatory subunit 3 OS=Bos taurus OX=9913 GN=PSMD3 PE=2 SV=1	8.65	60956.6
0.000284063	A6H7G2	DBNL_BOVIN Drebrin-like protein OS=Bos taurus OX=9913 GN=DBNL PE=2 SV=1	4.95	47722.8
0.000280251	O46414	FRIH_BOVIN Ferritin heavy chain OS=Bos taurus OX=9913 GN=FTH1 PE=2 SV=3	5.54	21051.5
0.000271128	Q2HJ49	MOES_BOVIN Moesin OS=Bos taurus OX=9913 GN=MSN PE=2 SV=3	5.9	67975.2
0.000271128	Q9TTK4	LYST_BOVIN Lysosomal-trafficking regulator OS=Bos taurus OX=9913 GN=LYST PE=1 SV=1	5.97	428601
0.000268688	Q28017	PAFA_BOVIN Platelet-activating factor acetylhydrolase OS=Bos taurus OX=9913 GN=PLA2G7 PE=2 SV=1	5.96	47814.2
0.000264275	Q3MHN0	PSB6_BOVIN Proteasome subunit beta type-6 OS=Bos taurus OX=9913 GN=PSMB6 PE=1 SV=1	4.91	22010.1
0.000255449	Q5E987	PSA5_BOVIN Proteasome subunit alpha type-5 OS=Bos taurus OX=9913 GN=PSMA5 PE=1 SV=1	4.74	26411
0.000255449	A6QLR4	FLOT2_BOVIN Flotillin-2 OS=Bos taurus OX=9913 GN=FLOT2 PE=2 SV=1	5.24	46863.9
0.000241743	P35541	SAA_BOVIN Serum amyloid A protein OS=Bos taurus OX=9913 GN=SAA1 PE=1 SV=2	6.94	12602.7
0.00023489	P26892	IL6_BOVIN Interleukin-6 OS=Bos taurus OX=9913 GN=IL6 PE=2 SV=1	6.63	20671.9
0.000232407	Q27975	HS71A_BOVIN Heat shock 70 kDa protein 1A OS=Bos taurus OX=9913 GN=HSPA1A PE=1 SV=2	5.68	70127.3
0.000223327	Q3ZC42	ADHX_BOVIN Alcohol dehydrogenase class-3 OS=Bos taurus OX=9913 GN=ADH5 PE=2 SV=1	7.6	39545.9
0.000220887	Q3T0G8	SYUA_BOVIN Alpha-synuclein OS=Bos taurus OX=9913 GN=SNCA PE=2 SV=1	4.69	14508.1
0.000220328	Q2T9S0	TBB3_BOVIN Tubulin beta-3 chain OS=Bos taurus OX=9913 GN=TUBB3 PE=1 SV=1	4.83	50432.7
0.000207648	Q5EAC7	CPIN1_BOVIN Anamorsin OS=Bos taurus OX=9913 GN=CIAPIN1 PE=2 SV=1	5.23	33204.8
0.00020054	Q3ZBN5	ASPN_BOVIN Asporin OS=Bos taurus OX=9913 GN=ASPN PE=2 SV=1	9.24	40436.9
0.000191205	O02675	DPYL2_BOVIN Dihydropyrimidinase-related protein 2 OS=Bos taurus OX=9913 GN=DPYSL2 PE=1 SV=1	5.95	62277.6
0.000191205	A6H7B5	CSN3_BOVIN COP9 signalosome complex subunit 3 OS=Bos taurus OX=9913 GN=COPS3 PE=2 SV=1	6.2	47667.8
0.000191205	P14568	ASSY_BOVIN Argininosuccinate synthase OS=Bos taurus OX=9913 GN=ASS1 PE=2 SV=1	7.15	46417.2
0.000191205	A7YWG4	GGH_BOVIN Gamma-glutamyl hydrolase OS=Bos taurus OX=9913 GN=GGH PE=2 SV=1	8.96	33330.3
0.000191205	P55918	MFAP4_BOVIN Microfibril-associated glycoprotein 4 OS=Bos taurus OX=9913 GN=MFAP4 PE=1 SV=2	5.21	26541.6
0.000191205	Q3ZBA8	NDRG2_BOVIN Protein NDRG2 OS=Bos taurus OX=9913 GN=NDRG2 PE=2 SV=1	5.49	39077.3
0.000191205	Q05718	IBP6_BOVIN Insulin-like growth factor-binding protein 6 OS=Bos taurus OX=9913 GN=IGFBP6 PE=2 SV=2	8.5	22378.7
0.000191205	Q56K14	RLA1_BOVIN 60S acidic ribosomal protein P1 OS=Bos taurus OX=9913 GN=RPLP1 PE=3 SV=1	4.21	11382.7
0.000191205	Q5E973	RL18_BOVIN 60S ribosomal protein L18 OS=Bos taurus OX=9913 GN=RPL18 PE=2 SV=3	11.69	21535.4
0.000190087	Q2KJ39	RCN3_BOVIN Reticulocalbin-3 OS=Bos taurus OX=9913 GN=RCN3 PE=2 SV=1	4.7	35307.3
0.000188461	Q2KJH6	SERPH_BOVIN Serpin H1 OS=Bos taurus OX=9913 GN=SERPINH1 PE=2 SV=1	8.82	44582.1
0.000175526	Q08DN8	FLOT1_BOVIN Flotillin-1 OS=Bos taurus OX=9913 GN=FLOT1 PE=2 SV=1	6.71	47353.3
0.000173086	Q08E20	ESTD_BOVIN S-formylglutathione hydrolase OS=Bos taurus OX=9913 GN=ESD PE=2 SV=1	6.54	31416.7
0.000173086	Q28034	GLU2B_BOVIN Glucosidase 2 subunit beta OS=Bos taurus OX=9913 GN=PRKCSH PE=2 SV=1	4.36	58639.2
0.000173086	P15783	PSPC_BOVIN Pulmonary surfactant-associated protein C OS=Bos taurus OX=9913 GN=SFTPC PE=1 SV=3	8.96	3567.71
0.000159847	P46193	ANXA1_BOVIN Annexin A1 OS=Bos taurus OX=9913 GN=ANXA1 PE=1 SV=2	6.41	38820.5
0.000159847	Q29RL0	TBC31_BOVIN TBC1 domain family member 31 OS=Bos taurus OX=9913 GN=TBC1D31 PE=2 SV=1	8.58	123866
0.000159847	Q3T0X6	RS16_BOVIN 40S ribosomal protein S16 OS=Bos taurus OX=9913 GN=RPS16 PE=2 SV=3	10.21	16445.3
0.000159847	Q95M17	CHIA_BOVIN Acidic mammalian chitinase OS=Bos taurus OX=9913 GN=CHIA PE=1 SV=1	5.26	49954.7
0.000159847	A6H6Z7	TPX2_BOVIN Targeting protein for Xklp2 OS=Bos taurus OX=9913 GN=TPX2 PE=2 SV=1	9.4	81592.5
0.000159847	H2AM11	L_SBVBH RNA-directed RNA polymerase L OS=Bovine Schmallenberg virus (isolate Bovine/BH80/Germany/2011) OX=1318464 GN=L PE=3 SV=1	6.66	261027
0.000159847	P19427	DERM_BOVIN Dermatopontin OS=Bos taurus OX=9913 GN=DPT PE=1 SV=3	4.96	21989.3
0.000159847	Q2M2T3	MPCX_BOVIN Mitochondrial pyruvate carrier-like protein OS=Bos taurus OX=9913 PE=2 SV=1	6.39	19166.6
0.000159847	Q32L23	LIMK2_BOVIN LIM domain kinase 2 OS=Bos taurus OX=9913 GN=LIMK2 PE=2 SV=1	6.54	72164.8
0.000157407	Q32L89	PIGH_BOVIN Phosphatidylinositol N-acetylglucosaminyltransferase subunit H OS=Bos taurus OX=9913 GN=PIGH PE=2 SV=1	6.19	21005.7
0.000154967	Q95116	TSP2_BOVIN Thrombospondin-2 OS=Bos taurus OX=9913 GN=THBS2 PE=2 SV=2	4.64	127800
0.000154967	P80209	CATD_BOVIN Cathepsin D OS=Bos taurus OX=9913 GN=CTSD PE=1 SV=2	5.43	37711.1
0.000154967	Q8SPP7	PGRP1_BOVIN Peptidoglycan recognition protein 1 OS=Bos taurus OX=9913 GN=PGLYRP1 PE=1 SV=1	9.38	18808.3
0.000154967	Q3ZBD9	MARE1_BOVIN Microtubule-associated protein RP/EB family member 1 OS=Bos taurus OX=9913 GN=MAPRE1 PE=2 SV=3	5.2	29982
0.000154967	P19632	PHOS_BOVIN Phosducin OS=Bos taurus OX=9913 GN=PDC PE=1 SV=2	4.9	28230.7
0.000154967	P61286	PABP1_BOVIN Polyadenylate-binding protein 1 OS=Bos taurus OX=9913 GN=PABPC1 PE=2 SV=1	9.52	70670.8
0.000154967	Q2KIA2	TR112_BOVIN Multifunctional methyltransferase subunit TRM112-like protein OS=Bos taurus OX=9913 GN=TRMT112 PE=2 SV=1	5.6	14319.6
0.000154967	Q2TBU3	GOSR1_BOVIN Golgi SNAP receptor complex member 1 OS=Bos taurus OX=9913 GN=GOSR1 PE=2 SV=1	9.46	28410.3
0.000154967	Q3SZI4	1433T_BOVIN 14-3-3 protein theta OS=Bos taurus OX=9913 GN=YWHAQ PE=1 SV=1	4.68	27764.2
0.000154967	Q3ZBU7	TBB4A_BOVIN Tubulin beta-4A chain OS=Bos taurus OX=9913 GN=TUBB4A PE=2 SV=1	4.78	49585.8
0.000136805	A4FV54	RAB8A_BOVIN Ras-related protein Rab-8A OS=Bos taurus OX=9913 GN=RAB8A PE=2 SV=1	9.14	23358.8
0.000136805	Q0VCL3	ATG3_BOVIN Ubiquitin-like-conjugating enzyme ATG3 OS=Bos taurus OX=9913 GN=ATG3 PE=2 SV=1	4.66	35752.3
0.000127724	Q9XSJ4	ENOA_BOVIN Alpha-enolase OS=Bos taurus OX=9913 GN=ENO1 PE=1 SV=4	6.37	47194.9
0.000127724	P38657	PDIA3_BOVIN Protein disulfide-isomerase A3 OS=Bos taurus OX=9913 GN=PDIA3 PE=2 SV=1	5.78	54398.4
0.000125284	Q32PE2	MOG1_BOVIN Ran guanine nucleotide release factor OS=Bos taurus OX=9913 GN=RANGRF PE=2 SV=1	4.63	20680.3
0.000125284	A2I7N1	SPA35_BOVIN Serpin A3-5 OS=Bos taurus OX=9913 GN=SERPINA3-5 PE=3 SV=1	6.06	43769.2
9.56023e-05	P53710	ITA2_BOVIN Integrin alpha-2 (Fragment) OS=Bos taurus OX=9913 GN=ITGA2 PE=2 SV=1	5.47	127030
9.56023e-05	P79342	S10AD_BOVIN Protein S100-A13 OS=Bos taurus OX=9913 GN=S100A13 PE=3 SV=2	5.5	11198.9
9.56023e-05	Q3ZCF2	MED10_BOVIN Mediator of RNA polymerase II transcription subunit 10 OS=Bos taurus OX=9913 GN=MED10 PE=2 SV=1	5.82	15688
9.56023e-05	Q5EA62	FBLN5_BOVIN Fibulin-5 OS=Bos taurus OX=9913 GN=FBLN5 PE=2 SV=1	4.48	47769.4
9.56023e-05	A6QLY7	PBIP1_BOVIN Pre-B-cell leukemia transcription factor-interacting protein 1 OS=Bos taurus OX=9913 GN=PBXIP1 PE=2 SV=1	4.99	80257.5
9.56023e-05	Q1JQ94	RTL8_BOVIN Retrotransposon Gag-like protein 8 OS=Bos taurus OX=9913 GN=RTL8A PE=3 SV=1	5.39	13246.4
9.56023e-05	Q2KJ63	KLKB1_BOVIN Plasma kallikrein OS=Bos taurus OX=9913 GN=KLKB1 PE=2 SV=1	6.42	27455.2
9.56023e-05	P62157	CALM_BOVIN Calmodulin OS=Bos taurus OX=9913 GN=CALM PE=1 SV=2	4.09	16706.4
9.56023e-05	A8E639	F168B_BOVIN Myelin-associated neurite-outgrowth inhibitor OS=Bos taurus OX=9913 GN=FAM168B PE=2 SV=2	9.26	20283.9
9.56023e-05	Q5PXY7	RABP2_BOVIN Cellular retinoic acid-binding protein 2 OS=Bos taurus OX=9913 GN=CRABP2 PE=2 SV=3	5.37	15735
9.56023e-05	A2VDR2	ACBD6_BOVIN Acyl-CoA-binding domain-containing protein 6 OS=Bos taurus OX=9913 GN=ACBD6 PE=2 SV=1	4.93	31275
9.56023e-05	A5D989	EF1D_BOVIN Elongation factor 1-delta OS=Bos taurus OX=9913 GN=EEF1D PE=2 SV=2	4.94	31010.6
9.56023e-05	C0HLN2	CO9A2_BOVIN Collagen alpha-2(IX) chain OS=Bos taurus OX=9913 GN=COL9A2 PE=1 SV=1	9.23	62747.9
9.56023e-05	P18130	ADA1A_BOVIN Alpha-1A adrenergic receptor OS=Bos taurus OX=9913 GN=ADRA1A PE=2 SV=1	9.25	51466.4
9.56023e-05	P46446	ACY2_BOVIN Aspartoacylase OS=Bos taurus OX=9913 GN=ASPA PE=1 SV=1	6.19	35737.9
9.56023e-05	Q28146	NRX1A_BOVIN Neurexin-1 OS=Bos taurus OX=9913 GN=NRXN1 PE=1 SV=1	5.61	164860
9.56023e-05	Q2HJ86	TBA1D_BOVIN Tubulin alpha-1D chain OS=Bos taurus OX=9913 GN=TUBA1D PE=1 SV=1	4.91	50282.8
9.56023e-05	Q2HJB8	TBA8_BOVIN Tubulin alpha-8 chain OS=Bos taurus OX=9913 GN=TUBA8 PE=2 SV=1	5.06	50053.5
9.56023e-05	Q2LGB5	TOLIP_BOVIN Toll-interacting protein OS=Bos taurus OX=9913 GN=TOLLIP PE=2 SV=1	5.3	29950.3
9.56023e-05	Q2YY05	ODO1_STAAB 2-oxoglutarate dehydrogenase E1 component OS=Staphylococcus aureus (strain bovine RF122 / ET3-1) OX=273036 GN=odhA PE=3 SV=1	5.47	105364
9.56023e-05	Q2YYH4	URTF_STAAB Probable uridylyltransferase SAB2052c OS=Staphylococcus aureus (strain bovine RF122 / ET3-1) OX=273036 GN=SAB2052c PE=3 SV=1	4.9	44890.8
9.56023e-05	Q32L40	TCPA_BOVIN T-complex protein 1 subunit alpha OS=Bos taurus OX=9913 GN=TCP1 PE=1 SV=1	5.8	60206.4
9.56023e-05	Q32LP9	COR2A_BOVIN Coronin-2A OS=Bos taurus OX=9913 GN=CORO2A PE=2 SV=1	7.99	59845.3
9.56023e-05	Q3SYV7	ZN345_BOVIN Zinc finger protein 345 OS=Bos taurus OX=9913 GN=ZNF345 PE=2 SV=1	8.87	55270.3
9.56023e-05	Q3SZL0	NR1H4_BOVIN Bile acid receptor OS=Bos taurus OX=9913 GN=NR1H4 PE=2 SV=1	6.34	55459.6
9.56023e-05	Q8SPF8	BPIB1_BOVIN BPI fold-containing family B member 1 OS=Bos taurus OX=9913 GN=BPIFB1 PE=2 SV=1	8.94	49458.2
